# Supplementary material for: Allosteric ligands control the activation of a class C GPCR heterodimer by acting at the transmembrane interface
Source: eLife. 2021 Dec 6;10:e70188. doi: 10.7554/eLife.70188 (PMC8700296; doi:10.7554/eLife.70188)
Supplement: Figure 2—source data 1. [file elife-70188-fig2-data1.xlsx]

## Sheet: Fig. 2B Ca2+_Raw
GB1+GB2 GABA dose
		20160523	20160525	20160527	20160529	20160619	20160727	20160804	20170118	20170308	20170314	20170323	20170326	20170329	20170414	20170418	20170722	20170915	20170922
Concentration (M)	Log M
Buffer		1.009	1.03533	0.693	0.815	0.998	0.9795	0.876	0.938	0.849667	0.799	0.797667	0.853	0.838	0.7545	0.848333	1.585	1.222	1.24208
1e-09	-9	1.15756	1.089	0.905333	0.864	1.008	1.11106	1.054	1.075	0.918935	0.849684	1.39133	1.10067	0.912	1.183	0.9125	1.83033	4.2465	1.55904
1e-08	-8	2.90782	3.101	1.39867	2.30733	2.449	2.23761	2.498	4.345	2.40614	2.96375	2.971	2.99933	2.30567	1.767	2.801	6.779	9.1285	11.0086
1e-07	-7	4.88926	4.7825	4.758	4.56433	4.973	4.94392	8.90767	10.4393	5.57397	5.34918	7.51267	7.417	6.29733	6.2235	5.311	14.926	17.379	21.2198
1e-06	-6	6.29323	5.93333	6.212	5.542	6.14533	6.18367	10.3115	11.749	7.9009	6.61658	9.9205	9.82133	7.235	8.193	7.738	18.67	23.225	26.6451
1e-05	-5	6.65695	6.695	6.39133	6.1	6.813	6.9706	10.97	11.9935	8.55366	7.04313	10.437	10.6757	8.171	8.81433	8.3415	20.58	24.7395	28.471
0.0001	-4	6.71003	6.82367	6.76833	6.243	6.79	6.97998	11.107	12.9905	8.9	7.21228	10.89	11.089	8.61833	9.49733	8.698	20.8123	24.9605	29.1951
0.001	-3	6.787	6.855	6.874	6.212	6.876	7.0375	11.202	13.7283	8.94667	7.13433	11.028	11.5427	8.71933	9.55967	8.79367	20.6893	25.281	28.8614
GB1+GB2 rac-BHFF dose
		20160523	20160525	20160527	20160529	20160619	20160727	20160804	20170118	20170308	20170314	20170323	20170326	20170329		20170418	20170722	20170915	20170922
Concentration (M)	Log M
Buffer		1.079	1.04867	0.645	0.77988	1.016	0.9725	0.985	0.915	0.879	0.797667	0.91	0.888333	0.868		0.892	1.3695
1e-07	-7	1.0575	1.162	0.792	0.77197	0.988	1.034	1.02	0.92	0.981	0.801667	0.9595	0.939	1.066		0.899	1.437
3e-07	-6.52288	1.089	1.168	0.701	0.81397	1.0205	1.018	1.081	0.97	1.01	0.822333	1.029	0.92	1.183		0.917	1.456
1e-06	-6	1.072	1.1375	0.695	0.777	1.0355	1.04767	1.116	1.325	1.041	0.895667	1.1	0.9865	1.1985		0.9385	1.4545	1.3655	1.2385
3e-06	-5.52288	1.068	1.116	0.705	0.9495	1.07467	1.372	1.2955	1.46467	1.067	0.948	0.9765	1.00133	1.30133		1.01933	1.88033	2.129	2.3705
1e-05	-5	2.8275	2.791	2.31233	2.73067	2.646	2.861	2.429	3.227	1.881	1.80667	3.2	1.861	1.714		2.5465	4.062	5.685	8.60467
3e-05	-4.52288	4.041	3.76533	4.08133	4.248	5.1185	4.561	5.4235	5.774	4.54	4.42067	6.4135	4.946	4.702		5.3085	7.553	13.233	15.5525
0.0001	-4	4.495	4.35967	4.37767	4.45467	6.2065	5.526	7.5165	8.289	5.50967	5.58133	8.39767	7.84933	6.16233		7.18267	9.90367	17.241	19.421
0.0003	-3.52288																	17.332	19.4163
GB1+GB2 CGP7930 dose
										20170308			20170326	20170329		20170418
Concentration (M)	Log M
Buffer										0.85			0.86	0.862		0.914
1e-07	-7									0.922			0.8985	0.9985		0.962667
3e-07	-6.52288									0.92			0.98	0.983		0.9625
1e-06	-6									0.948			0.873333	0.993		0.9545
3e-06	-5.52288									0.935			0.999667	0.976		0.968667
1e-05	-5									0.939			0.993667	1.02367		0.970333
3e-05	-4.52288									1.938			1.6605	2.349		3.478
0.0001	-4									4.2335			5.406	4.23		6.5365
GB1+GB2 GS39783 dose
												20170323	20170326	20170329	20170414
Concentration (M)	Log M
Buffer												1.0055	0.897	0.817333	0.7755
1e-07	-7											1.079	0.97	0.918333	0.8865
3e-07	-6.52288											1.05167	0.905	1.034	0.917
1e-06	-6											0.979333	0.931	0.92	1.052
3e-06	-5.52288											0.982667	0.9835	1.1085	0.9595
1e-05	-5											1.075	0.948	1.158	0.982
3e-05	-4.52288											1.13	0.987667	1.259	0.9275
0.0001	-4											1.96833	1.561	1.394	1.90267

## Sheet: Fig. 2B Ca2+_%
GB1+GB2 GABA dose
		20160523	20160525	20160527	20160529	20160619	20160727	20160804	20170118	20170308	20170314	20170323	20170326	20170329	20170414	20170418	20170722	20170915	20170922			Mean	SEM	N
Concentration (M)	Log M
Buffer		0	0	0	0	0	0	0	0	0	0	0	0	0	0	0	0	0	0			0	0	18
1e-09	-9	2.57118	0.92216	3.43526	0.907912	0.170126	2.17172	1.7238	1.07112	0.855475	0.800019	5.803	2.31688	0.938927	4.86646	0.807602	1.28418	12.5712	1.1476			2.4647	0.691302	18
1e-08	-8	32.863	35.4946	11.4167	27.6512	24.6853	20.7677	15.7079	26.6373	19.2228	34.1695	21.244	20.0786	18.6221	11.4989	24.5763	27.1875	32.863	35.3613			24.4471	1.82388	18
1e-07	-7	67.1557	64.388	65.7661	69.4707	67.625	65.4411	77.781	74.2853	58.3463	71.8223	65.6381	61.4051	69.2692	62.1113	56.1671	69.8323	67.1557	72.3325			66.9996	1.27927	18
1e-06	-6	91.4543	84.1629	89.2898	87.5857	87.5695	85.9057	91.3761	84.5248	87.0845	91.8275	89.1744	83.8972	81.1665	84.4788	86.7134	89.43	91.4543	91.9755			87.7262	0.765731	18
1e-05	-5	97.7493	97.2507	92.1911	97.9248	98.9282	98.8956	97.7532	86.4364	95.1463	98.5604	94.2231	91.8894	93.0426	91.5353	94.309	99.4277	97.7493	98.5865			95.6444	0.833204	18
0.0001	-4	98.6679	99.4616	98.2905	100.574	98.5369	99.0505	99.08	94.2313	99.4236	101.23	98.6511	95.756	98.7185	99.2921	98.7959	100.644	98.6679	101.208			98.9045	0.403409	18
0.001	-3	100	100	100	100	100	100	100	100	100	100	100	100	100	100	100	100	100	100			100	1.40708e-15	18
GB1+GB2 rac-BHFF dose
		20160523	20160525	20160527	20160529	20160619	20160727	20160804	20170118	20170308	20170314	20170323	20170326	20170329		20170418	20170722	20170915	20170922			Mean	SEM	N
Concentration (M)	Log M
Buffer		1.21149	0.229108	-0.776573	-0.650732	0.306227	-0.11555	1.05559	-0.179823	0.362274	-0.021046	1.09804	0.330537	0.380646		0.549589	-1.12802					0.176784	0.175901	15
1e-07	-7	0.839391	2.17653	1.60168	-0.797295	-0.170126	0.899637	1.39454	-0.140731	1.622	0.042092	1.5819	0.804515	2.89291		0.637691	-0.774693					0.840669	0.276051	15
3e-07	-6.52288	1.38456	2.27963	0.129429	-0.0190847	0.382783	0.635523	1.98528	0.250189	1.98016	0.368305	2.26125	0.626774	4.37743		0.864239	-0.675239					1.12208	0.328972	15
1e-06	-6	1.09034	1.75554	0.0323572	-0.704095	0.637972	1.12523	2.32423	3.02572	2.36302	1.52583	2.95526	1.24887	4.5741		1.13484	-0.683091	0.59645	-0.0129619			1.35233	0.338391	17
3e-06	-5.52288	1.02111	1.3861	0.194143	2.49213	1.3043	6.47904	4.06256	4.11769	2.68412	2.35189	1.74807	1.38763	5.87887		2.15221	1.5459	3.7699	4.08561			2.74478	0.422182	17
1e-05	-5	31.4728	30.1678	26.1986	35.495	28.0367	31.0581	15.0397	17.8963	12.7372	15.9055	23.4825	9.42967	11.1149		21.3731	12.9656	18.5502	26.6573			21.6224	1.96924	17
3e-05	-4.52288	52.4749	46.9099	54.8185	63.6094	70.1004	59.1202	44.0393	37.8098	45.5766	57.1662	54.8939	38.2893	49.0272		56.1357	31.239	49.9231	51.813			50.7616	2.35729	17
0.0001	-4	60.3323	57.1224	59.6128	67.4387	88.6101	75.0495	64.3085	57.4731	57.5522	75.4867	74.2889	65.4495	67.5563		79.7239	43.5433	66.5822	65.8195			66.2323	2.53459	17
0.0003	-3.52288																	66.9604	65.8026			66.3815	0.578901	2
GB1+GB2 CGP7930 dose
										20170308			20170326	20170329		20170418						Mean	SEM	N
Concentration (M)	Log M
Buffer										0.00411675			0.0654838	0.304517		0.826481						0.30015	0.187027	4
1e-07	-7									0.893335			0.425645	2.03646		1.439						1.19861	0.347664	4
3e-07	-6.52288									0.868634			1.18806	1.83979		1.4369						1.33335	0.204995	4
1e-06	-6									1.21444			0.190215	1.96667		1.33621						1.17689	0.367886	4
3e-06	-5.52288									1.05389			1.37204	1.75097		1.51452						1.42285	0.145711	4
1e-05	-5									1.10329			1.31591	2.35578		1.53549						1.57762	0.273981	4
3e-05	-4.52288									13.4412			7.55402	19.1719		33.097						18.316	5.46805	4
0.0001	-4									41.7912			42.5925	43.0384		71.5913						49.7534	7.28388	4
GB1+GB2 GS39783 dose
												20170323	20170326	20170329	20170414							Mean	SEM	N
Concentration (M)	Log M
Buffer												2.03154	0.411612	-0.262223	0.238496							0.604857	0.496556	4
1e-07	-7											2.74999	1.09451	1.01929	1.49912							1.59073	0.400527	4
3e-07	-6.52288											2.48281	0.486451	2.48689	1.84551							1.82541	0.471076	4
1e-06	-6											1.77576	0.729677	1.04043	3.3787							1.73114	0.591357	4
3e-06	-5.52288											1.80835	1.22081	3.43216	2.32818							2.19737	0.469648	4
1e-05	-5											2.71089	0.888709	4.06023	2.58371							2.56088	0.649822	4
3e-05	-4.52288											3.24851	1.25978	5.34174	1.96476							2.9537	0.896149	4
0.0001	-4											11.4431	6.62322	7.05464	13.0397							9.54016	1.59568	4

## Sheet: Fig. 2C IP1_Raw
GB1+GB2 GABA dose
		20200930	20201001	20201007	20201008
Concentration (M)	Log M
Buffer	-14	88.8286	248.256	294.085	179.709
1e-09	-9	90.5272	262.246	297.938	219.637
1e-08	-8	158.03	269.075	343.245	242.888
1e-07	-7	352.449	353.332	440.106	316.93
1e-06	-6	368.451	532.617	691.183	512.774
1e-05	-5	494.832	738.692	790.091	614.113
0.0001	-4	519.132	765.82	835.742	733.69
0.001	-3		786.021	837.127	734.377
GB1+GB2 rac-BHFF dose
		20200930	20201001	20201007	20201008
Concentration (M)	Log M
Buffer	-14	82.3788	223.117	291.024	172.276
1e-09	-9	91.7197	197.613	247.804	163.355
1e-08	-8	99.2275	202.25	231.813	179.418
1e-07	-7	100.999	221.042	292.869	179.06
1e-06	-6	139.256	282.858	350.672	258.022
1e-05	-5	291.267	498.58	681.853	448.466
0.0001	-4	455.007	589.3	766.246	508.372
0.001	-3
GB1+GB2 CGP7930 dose
		20200930	20201001	20201007	20201008
Concentration (M)	Log M
Buffer	-14	82.7172	220.903	309.183	165.471
1e-09	-9	90.9134	209.839	292.969
1e-08	-8	97.5109	216.045	291.814
1e-07	-7	117.409	219.515	305.221	161.345
1e-06	-6	81.7938	217.03	292.924	237.458
1e-05	-5	119.498	266.542	383.527	313.856
0.0001	-4	427.775	586.827	768.19	522.625
0.001	-3
GB1+GB2 GS39783 dose
		20200930	20201001	20201007	20201008
Concentration (M)	Log M
Buffer	-14	71.2452	226.19	289.18	171.918
1e-09	-9	74.8497	217.602	276.72	155.73
1e-08	-8	92.957	227.933	252.508	207.021
1e-07	-7	98.9543	230.972	272.494	220.395
1e-06	-6	120.182	257.053	289.231	226.604
1e-05	-5	140.426	368.979	473.382	378.152
0.0001	-4	315.559	565.937	739.964	468.674
0.001	-3

## Sheet: Fig. 2C IP1_%
GB1+GB2 GABA dose
		20200930	20201001	20201007	20201008				Mean	SEM	N
Concentration (M)	Log M
Buffer	-14	0	0	0	0				0	0	4
1e-09	-9	0.39475	2.70307	0.711345	7.20753				2.75417	1.5699	4
1e-08	-8	16.082	4.02242	9.07575	11.4045				10.1462	2.5077	4
1e-07	-7	61.2639	20.3021	26.9582	24.7699				33.3235	9.41587	4
1e-06	-6	64.9825	54.9422	73.3118	60.1221				63.3396	3.90526	4
1e-05	-5	94.3527	94.7586	91.572	78.415				89.7746	3.85216	4
0.0001	-4	100	100	100	100				100	0	4
0.001	-3		103.903	100.256	100.124				101.428	1.23833	3
GB1+GB2 rac-BHFF dose
		20200930	20201001	20201007	20201008				Mean	SEM	N
Concentration (M)	Log M
Buffer	-14	-1.4989	-4.85719	-0.565261	-1.34163				-2.06575	0.952596	4
1e-09	-9	0.671868	-9.78497	-8.54444	-2.95204				-5.1524	2.4449	4
1e-08	-8	2.41665	-8.88903	-11.4967	-0.0524892				-4.50538	3.36449	4
1e-07	-7	2.8283	-5.25801	-0.224568	-0.11708				-0.69284	1.67804	4
1e-06	-6	11.719	6.68548	10.4469	14.1365				10.747	1.55508	4
1e-05	-5	47.0456	48.3659	71.5892	48.5137				53.8786	5.91276	4
0.0001	-4	85.0978	65.8941	87.1697	59.3274				74.3723	6.93445	4
0.001	-3								#DIV/0!	#DIV/0!	0
GB1+GB2 CGP7930 dose
		20200930	20201001	20201007	20201008				Mean	SEM	N
Concentration (M)	Log M
Buffer	-14	-1.42026	-5.28497	2.78726	-2.57018				-1.62204	1.67826	4
1e-09	-9	0.484501	-7.42257	-0.20618					-2.38142	2.52845	3
1e-08	-8	2.01772	-6.22366	-0.419294					-1.54175	2.44438	3
1e-07	-7	6.64198	-5.55314	2.0558	-3.3149				-0.042565	2.74106	4
1e-06	-6	-1.63486	-6.03329	-0.214472	10.4244				0.635433	3.49012	4
1e-05	-5	7.12732	3.53317	16.5126	24.2151				12.847	4.67379	4
0.0001	-4	78.7693	65.4163	87.5287	61.9004				73.4037	5.94721	4
0.001	-3								#DIV/0!	#DIV/0!	0
GB1+GB2 GS39783 dose
		20200930	20201001	20201007	20201008				Mean	SEM	N
Concentration (M)	Log M
Buffer	-14	-4.08628	-4.26338	-0.905643	-1.40635				-2.66541	0.878179	4
1e-09	-9	-3.24862	-5.92278	-3.20597	-4.32845				-4.17646	0.637407	4
1e-08	-8	0.959416	-3.92665	-7.67595	4.93013				-1.42826	2.75992	4
1e-07	-7	2.35315	-3.33945	-3.98614	7.3443				0.592966	2.66319	4
1e-06	-6	7.28625	1.69974	-0.896175	8.46513				4.13874	2.23464	4
1e-05	-5	11.991	23.3252	33.1016	35.8213				26.0598	5.40278	4
0.0001	-4	52.6908	61.3801	82.3175	52.1616				62.1375	7.0508	4
0.001	-3								#DIV/0!	#DIV/0!	0

## Sheet: Fig. 2F BRET
Compounds
												Mean	SEM	N
GABA: 100 μM												#DIV/0!	#DIV/0!	0
PAM: 100 μM												#DIV/0!	#DIV/0!	0
rac-BHFF
				20170607	20170902	20170904						Mean	SEM	N
Basal				0.992333	1.064	1.08633						1.04756	0.0283538	3
Buffer				0.991333	1.068	1.09733						1.05222	0.0316001	3
GABA				0.915	0.988333	1.00567						0.969667	0.0277876	3
rac-BHFF				0.943667	1.015	1.03933						0.999333	0.028706	3
CGP7930
							20210830	20210904	20210905			Mean	SEM	N
Basal							1.01175	0.949	0.913			0.957917	0.0288532	3
Buffer							1.008	0.949	0.912			0.956333	0.0279543	3
GABA							0.9065	0.8775	0.852			0.878667	0.0157436	3
CGP7930							0.9875	0.9165	0.886			0.93	0.030068	3
GS39783
	20170430	20170505	20170507									Mean	SEM	N
Basal	1.0145	1.008	1.007									1.00983	0.00235112	3
Buffer	1.0148	1.018	1.008									1.0136	0.00294845	3
GABA	0.914333	0.922333	0.932667									0.923111	0.00530665	3
GS39783	1.01733	1.01333	1.011									1.01389	0.00184926	3

## Sheet: Fig. 2F ΔBRET
Compounds
												Mean	SEM	N
GABA: 100 μM												#DIV/0!	#DIV/0!	0
PAM: 100 μM												#DIV/0!	#DIV/0!	0
rac-BHFF
				20170607	20170902	20170904						Mean	SEM	N
Basal				0	0	0						0	0	3
Buffer				-0.001	0.004	0.011						0.00466667	0.0034801	3
GABA				-0.0773333	-0.0756667	-0.0806667						-0.0778889	0.00146986	3
rac-BHFF				-0.0486667	-0.049	-0.047						-0.0482222	0.00061864	3
CGP7930
							20210830	20210904	20210905			Mean	SEM	N
Basal							0	0	0			0	0	3
Buffer							-0.00375	0	-0.001			-0.00158333	0.00112114	3
GABA							-0.10525	-0.0715	-0.061			-0.07925	0.0133487	3
CGP7930							-0.02425	-0.0325	-0.027			-0.0279167	0.00242527	3
GS39783
	20170430	20170505	20170507									Mean	SEM	N
Basal	0	0	0									0	0	3
Buffer	0.0003	0.01	0.001									0.00376667	0.00312321	3
GABA	-0.100167	-0.0856667	-0.0743333									-0.0867222	0.00747609	3
GS39783	0.00283333	0.00533333	0.004									0.00405556	0.000722222	3

## Sheet: Fig. 2G Ca2+_Raw
GB1+GB2 GABA dose
		20170613	20170619	20170622	20170628	20170701
Concentration (M)	Log M
Buffer		1.04133	1.382	1.189	1.18767	1.1045
1e-09	-9	1.41333	1.505	1.81333	2.45933	1.329
1e-08	-8	3.4535	5.631	3.78167	7.2305	4.774
1e-07	-7	8.283	14.124	10.0577	14.1973	10.8317
1e-06	-6	9.69833	16.164	12.9817	16.5577	12.999
1e-05	-5	10.311	17.483	13.809	19.1663	14.6787
0.0001	-4	10.526	17.887	14.107	19.6133	14.778
0.001	-3	10.901	18.2193	14.294	19.942	14.8793
GB1+GB2 GABA dose + rac-BHFF 10 μM
		20170613	20170619	20170622	20170628	20170701
Concentration (M)	Log M
Buffer		3.214	4.177	3.9205	4.104	4.62467
1e-09	-9	4.88167	5.44867	4.856	6.283	5.83233
1e-08	-8	6.42367	8.53433	6.211	9.049	6.93167
1e-07	-7	10.054	15.181	10.899	14.9747	12.276
1e-06	-6	10.6383	17.021	13.3243	17.655	13.508
1e-05	-5	10.9173	18.1725	14.2523	19.6137	14.7603
0.0001	-4	11.2283	18.5327	14.4393	20.1343	14.9607
0.001	-3	11.458	18.8263	14.8567	20.6	15.1107
GB1+GB2 GABA dose + rac-BHFF 20 μM
			20170619	20170622	20170628	20170701
Concentration (M)	Log M
Buffer			7.5755	5.5055	9.35933	7.24667
1e-09	-9		9.458	7.5595	9.4475	8.429
1e-08	-8		12.2163	8.27567	11.0453	10.4217
1e-07	-7		15.762	11.963	15.724	13.8023
1e-06	-6		17.5007	13.547	18.1233	14.689
1e-05	-5		18.6795	14.6087	20.1713	15.357
0.0001	-4		18.7237	14.7063	20.7697	15.6923
0.001	-3		19.17	15.0227	21.1297	15.5987

## Sheet: Fig. 2G Ca2+_%
GB1+GB2 GABA dose
		20170613	20170619	20170622	20170628	20170701		Mean	SEM	N
Concentration (M)	Log M
Buffer		0	0	0	0	0		0	0	5
1e-09	-9	3.77295	0.730519	4.76408	6.78066	1.62978		3.5356	1.0862	5
1e-08	-8	24.465	25.2356	19.7838	32.221	26.6392		25.6689	2.00179	5
1e-07	-7	73.4474	75.6771	67.6739	69.3689	70.6155		71.3565	1.43353	5
1e-06	-6	87.8022	87.793	89.986	81.9544	86.3495		86.777	1.33831	5
1e-05	-5	94.016	95.6268	96.2991	95.8641	98.5432		96.0698	0.72894	5
0.0001	-4	96.1966	98.0262	98.5731	98.2475	99.2644		98.0616	0.510988	5
0.001	-3	100	100	100	100	100		100	0	5
GB1+GB2 GABA dose + rac-BHFF 10 μM
		20170613	20170619	20170622	20170628	20170701		Mean	SEM	N
Concentration (M)	Log M
Buffer		22.0359	16.6	20.8432	15.5502	25.5551		20.1169	1.8304	5
1e-09	-9	38.9499	24.1527	27.9817	27.1688	34.3223		30.5151	2.68083	5
1e-08	-8	54.5894	42.479	38.3213	41.9174	42.303		43.922	2.77384	5
1e-07	-7	91.4094	81.9548	74.0939	73.5137	81.1008		80.4145	3.25042	5
1e-06	-6	97.3359	92.8829	92.6008	87.8055	90.0446		92.1339	1.59594	5
1e-05	-5	100.166	99.7218	99.6821	98.2493	99.1361		99.391	0.328841	5
0.0001	-4	103.32	101.861	101.109	101.026	100.59		101.581	0.480351	5
0.001	-3	105.649	103.605	104.294	103.509	101.679		103.747	0.643015	5
GB1+GB2 GABA dose + rac-BHFF 20 μM
			20170619	20170622	20170628	20170701		Mean	SEM	N
Concentration (M)	Log M
Buffer			36.7843	32.9378	43.5722	44.5898		39.471	2.78272	4
1e-09	-9		47.9648	48.6112	44.0423	53.1731		48.4478	1.87076	4
1e-08	-8		64.3471	54.0761	52.5621	67.6391		59.6561	3.73268	4
1e-07	-7		85.4054	82.2129	77.5092	92.1814		84.3272	3.07959	4
1e-06	-6		95.7317	94.2999	90.3027	98.6183		94.7381	1.72983	4
1e-05	-5		102.733	102.401	101.223	103.468		102.456	0.467614	4
0.0001	-4		102.995	103.146	104.413	105.902		104.114	0.675427	4
0.001	-3		105.646	105.56	106.333	105.222		105.69	0.232889	4

## Sheet: Fig. 2H Ca2+_Raw
GB1+GB2 GABA dose
		20170613	20170619	20170622	20170628	20170701
Concentration (M)	Log M
Buffer		1.06067	1.392	1.085	0.9115	1.056
1e-09	-9	1.5865	1.72	1.28567	1.1585	1.37667
1e-08	-8	4.0595	6.046	4.28567	4.06967	4.307
1e-07	-7	10.2895	12.0407	10.131	9.41067	10.1397
1e-06	-6	12.6695	14.532	13.1413	12.7287	13.1293
1e-05	-5	13.356	15.6295	14.5787	14.252	13.853
0.0001	-4	14.1237	16.0665	14.782	14.6305	14.3633
0.001	-3	14.2375	16.272	14.8457	14.8147	14.672
GB1+GB2 GABA dose + CGP7930 10 μM
		20170613	20170619	20170622	20170628	20170701
Concentration (M)	Log M
Buffer		1.7675	2.2935	1.697	1.03833	1.3885
1e-09	-9	1.841	2.627	2.56933	2.206	2.249
1e-08	-8	4.7615	8.65867	7.101	6.80367	5.12967
1e-07	-7	12.1615	13.3163	11.74	11.6357	11.0253
1e-06	-6	13.6785	15.336	13.333	14.198	13.5803
1e-05	-5	14.3217	16.2603	14.6743	14.7503	14.5507
0.0001	-4	14.534	16.5297	15	15.214	14.772
0.001	-3	14.6035	16.7897	15.0593	15.1957	14.7987
GB1+GB2 GABA dose + CGP7930 20 μM
			20170619	20170622	20170628	20170701
Concentration (M)	Log M
Buffer			3.35367	2.392	2.896	2.21367
1e-09	-9		5.54433	3.44833	3.153	2.423
1e-08	-8		10.528	8.53167	8.01367	5.93133
1e-07	-7		14.131	12.939	12.332	11.9357
1e-06	-6		15.639	14.0963	15.0537	13.929
1e-05	-5		16.53	14.87	15.0493	14.746
0.0001	-4		16.7523	15.0053	15.1157	14.8273
0.001	-3		17.0317	15.3127	15.3563	15.0473

## Sheet: Fig. 2H Ca2+_%
GB1+GB2 GABA dose
		20170613	20170619	20170622	20170628	20170701		Mean	SEM	N
Concentration (M)	Log M
Buffer		0	0	0	0	0		0	0	5
1e-09	-9	3.99059	2.2043	1.45826	1.77657	2.35507		2.35696	0.437982	5
1e-08	-8	22.7584	31.2769	23.2595	22.7154	23.8763		24.7773	1.6384	5
1e-07	-7	70.0383	71.5636	65.7381	61.1312	66.7132		67.0369	1.81892	5
1e-06	-6	88.1003	88.3065	87.6145	84.9962	88.6702		87.5375	0.65784	5
1e-05	-5	93.3102	95.6821	98.0597	95.953	93.985		95.398	0.831522	5
0.0001	-4	99.1361	98.619	99.5373	98.6754	97.7331		98.7402	0.302109	5
0.001	-3	100	100	100	100	100		100	3.17764e-15	5
GB1+GB2 GABA dose + CGP7930 10 μM
		20170613	20170619	20170622	20170628	20170701		Mean	SEM	N
Concentration (M)	Log M
Buffer		5.36421	6.05847	4.44746	0.912262	2.44198		3.84488	0.952361	5
1e-09	-9	5.92201	8.29973	10.7868	9.31083	8.76175		8.61622	0.792904	5
1e-08	-8	28.0859	48.8351	43.7188	42.38	29.9182		38.5876	4.0692	5
1e-07	-7	84.2451	80.1366	77.4308	77.1347	73.2178		78.433	1.82443	5
1e-06	-6	95.7577	93.7097	89.0073	95.5646	91.9825		93.2043	1.25407	5
1e-05	-5	100.639	99.9216	98.7549	99.5373	99.1089		99.5923	0.327218	5
0.0001	-4	102.25	101.732	101.122	102.872	100.734		101.742	0.383141	5
0.001	-3	102.778	103.479	101.553	102.74	100.93		102.296	0.460782	5
GB1+GB2 GABA dose + CGP7930 20 μM
			20170619	20170622	20170628	20170701		Mean	SEM	N
Concentration (M)	Log M
Buffer			13.1832	9.49809	14.2737	8.50225		11.3643	1.39784	4
1e-09	-9		27.9055	17.1746	16.1222	10.0397		17.8105	3.71426	4
1e-08	-8		61.3978	54.1156	51.0831	35.8059		50.6006	5.38556	4
1e-07	-7		85.6116	86.1441	82.1432	79.9035		83.4506	1.47805	4
1e-06	-6		95.746	94.5545	101.719	94.5432		96.6407	1.71614	4
1e-05	-5		101.734	100.177	101.688	100.543		101.036	0.397146	4
0.0001	-4		103.228	101.16	102.165	101.141		101.924	0.496253	4
0.001	-3		105.105	103.394	103.896	102.757		103.788	0.497177	4

[truncated: 4 more sheets: Fig. 2I Ca2+_Raw, Fig. 2I Ca2+_%, Fig. 2S1 IP1_Raw, Fig. 2S1 IP1_%]
