# Supplementary material for: Allosteric ligands control the activation of a class C GPCR heterodimer by acting at the transmembrane interface
Source: eLife. 2021 Dec 6;10:e70188. doi: 10.7554/eLife.70188 (PMC8700296; doi:10.7554/eLife.70188)
Supplement: Figure 3—source data 1. [file elife-70188-fig3-data1.xlsx]

## Sheet: Fig. 3 rac_Raw
GB1+GB2
		20160330	20160331	20160524	20160525	20160527	20160531	20160601	20160604	20160605	20160619	20160716	20160719	20160721	20170115	20170118	20170224	20170225	20170226	20170722	20170915	20170922		Mean	SEM	N
Concentration (M)	Log M
Buffer		1.1	1.141	1.079	1.04867	0.645	0.991	0.9325	0.937	0.937	1.016	0.9535	0.721	0.896	1.005	0.915	1.03333	0.964	1.075	1.3695	1.3655	1.2385		1.01731	0.0379272	21
1e-07	-7	1.226	1.144	1.0575	1.162	0.792	1.03467	1.021	0.928	0.965	0.988	0.991	0.725	0.902	1.096	0.92	1.085	1.194	1.225	1.437	1.59923	1.50486		1.09511	0.0479139	21
3e-07	-6.52288	1.215	1.15	1.089	1.168	0.701	1.0725	1.217	0.963	1.03	1.0205	0.9745	0.723	0.9	1.099	0.97	1.1295	1.159	1.169	1.456	1.86472	1.58459		1.12644	0.0573143	21
1e-06	-6	1.199	1.193	1.072	1.1375	0.695	1.21833	1.275	0.93	1.038	1.0355	1.01033	0.946667	0.899	1.198	1.325	1.2065	1.173	1.207	1.4545	2.0922	1.49671		1.18106	0.0608673	21
3e-06	-5.52288	1.379	1.447	1.068	1.116	0.705	1.144	1.62	1.107	1.1235	1.07467	1.024	1.02333	1.071	1.182	1.46467	1.238	1.37	2.59833	1.88033	2.63306	1.67157		1.37812	0.10668	21
1e-05	-5	2.103	2.247	2.8275	2.791	2.31233	4.802	3.972	2.846	2.698	2.646	2.286	2.7705	1.333	2.8195	3.227	2.9515	2.76167	4.218	4.062	8.24417	7.19092		3.38615	0.359828	21
3e-05	-4.52288	7.5835	5.112	4.041	3.76533	4.08133	6.213	6.334	4.87367	4.98933	5.1185	3.739	4.412	3.501	5.531	5.774	7.189	6.802	8.043	7.553	13.0869	15.2933		6.33504	0.647444	21
0.0001	-4	8.783	7.021	4.495	4.35967	4.37767	8.24667	6.995	5.73	5.762	6.2065	4.91	6.3225	4.551	9.345	8.289	11.1265	8.626	9.967	9.90367	17.241	19.421		8.1752	0.864209	21
GB1+ΔVGB2
							20160531	20160601	20160604	20160605												20170922		Mean	SEM	N
Concentration (M)	Log M
Buffer							1.077	0.931	0.956	0.94												1.225		1.0258	0.0563573	5
1e-07	-7						0.99	0.991	0.942	1.096												1.38867		1.08153	0.0808036	5
3e-07	-6.52288						1.023	0.972333	0.995	0.941												1.4105		1.06837	0.0865854	5
1e-06	-6						0.993	0.91	1.08	0.972667												1.782		1.14753	0.160933	5
3e-06	-5.52288						1.034	1.62433	1.024	0.935												2.382		1.39987	0.274427	5
1e-05	-5						2.6225	4.17333	1.849	1.82733												4.16767		2.92797	0.527099	5
3e-05	-4.52288						5.99	5.8665	4.00567	4.2865												7.87		5.60373	0.694375	5
0.0001	-4						6.958	6.811	4.5805	5.046												8.96967		6.47303	0.781047	5
ΔVGB1+ΔVGB2
									20160604	20160605												20170922		Mean	SEM	N
Concentration (M)	Log M
Buffer									0.941333	0.983												1.426		1.11678	0.155078	3
1e-07	-7								0.964	1.01												1.418		1.13067	0.144279	3
3e-07	-6.52288								0.971	1.058												1.5545		1.1945	0.181744	3
1e-06	-6								0.965	1.033												1.904		1.30067	0.302305	3
3e-06	-5.52288								0.996	1.053												1.85833		1.30244	0.278431	3
1e-05	-5								1.33167	1.89167												4.21667		2.48	0.883253	3
3e-05	-4.52288								2.313	3.299												7.38267		4.33156	1.55188	3
0.0001	-4								2.885	4.259												8.38167		5.17522	1.65156	3
ΔVGB1+GB2
		20160330	20160331					20160601	20160604	20160605			20160719							20170722		20170922		Mean	SEM	N
Concentration (M)	Log M
Buffer		1.094	1.2445					0.969	0.9755	0.998			0.989							1.585		1.236		1.13637	0.0755265	8
1e-07	-7	1.204	1.21933					1.046	0.983	1.14			0.995							1.551		1.26333		1.17521	0.0653445	8
3e-07	-6.52288	1.2015	1.239					1.0195	1.286	1.016			0.996							1.669		1.786		1.27663	0.106348	8
1e-06	-6	1.3425	1.3					1.0225	0.98	1.05733			0.991							1.635		2.638		1.37079	0.198114	8
3e-06	-5.52288	1.65667	1.466					1.09667	1.014	1.092			1.022							1.695		3.162		1.52554	0.254059	8
1e-05	-5	1.906	2.45833					2.353	2.2245	3.12833			2.272							3.168		4.297		2.7259	0.272753	8
3e-05	-4.52288	4.262	3.404					3.2885	3.50867	4.64833			4.16767							4.868		7.75533		4.48781	0.510116	8
0.0001	-4	4.435	3.96367					4.0925	4.014	4.9855			6.50667							6.964		9.60733		5.57108	0.706285	8
GB2/1+GB2
													20160719				20170224	20170225	20170226		20170915			Mean	SEM	N
Concentration (M)	Log M
Buffer													0.995				1.1	1.087	1.043		1.27727			1.10045	0.0478891	5
1e-07	-7												1.0165				1.116	1.05	1.067		1.29748			1.1094	0.0496868	5
3e-07	-6.52288												1.036				1.195	1.03333	1.0965		1.30995			1.13416	0.0528323	5
1e-06	-6												1.11				1.31333	1.05133	1.21167		1.31351			1.19997	0.0529468	5
3e-06	-5.52288												1.203				2.21067	1.60233	2.59533		2.13567			1.9494	0.24472	5
1e-05	-5												3.233				4.113	3.92067	4.22367		5.46333			4.19073	0.36172	5
3e-05	-4.52288												5.20867				6.96933	7.85	7.575		12.4233			8.00527	1.1963	5
0.0001	-4												6.1435				11.0193	9.817	10.217		16.0265			10.6447	1.58482	5
GB1/2+GB2
														20160721						20170722	20170915	20170922		Mean	SEM	N
Concentration (M)	Log M
Buffer														0.869						1.437	1.2656	1.582		1.2884	0.154029	4
1e-07	-7													0.899						1.5265	1.25965	1.472		1.28929	0.14226	4
3e-07	-6.52288													0.905						1.5755	1.39657	1.7		1.39427	0.174572	4
1e-06	-6													0.912						1.625	1.3044	1.4885		1.33248	0.154785	4
3e-06	-5.52288													0.924						1.4965	1.665	1.583		1.41712	0.167936	4
1e-05	-5													0.939						1.56	1.8555	1.63267		1.49679	0.196269	4
3e-05	-4.52288													0.9555						1.518	1.471	1.628		1.39312	0.149538	4
0.0001	-4													0.9505						1.518	1.3835	1.62633		1.36958	0.14826	4
GB1-TM7+GB2
											20160619	20160716			20170115	20170118						20170922		Mean	SEM	N
Concentration (M)	Log M
Buffer											1.01	1.004			0.962	0.9705						1.33233		1.05577	0.0697589	5
1e-07	-7										1.054	1.00667			0.967	0.946						1.2885		1.05243	0.0618269	5
3e-07	-6.52288										1.02	1.044			0.952	0.99						1.29233		1.05967	0.0601657	5
1e-06	-6										1.103	1.019			0.947	1.02						1.6655		1.1509	0.130999	5
3e-06	-5.52288										1.127	1.011			0.931	0.954						1.44267		1.09313	0.0937314	5
1e-05	-5										1.054	1.015			0.957	0.995						1.31133		1.06647	0.063188	5
3e-05	-4.52288										1.156	1.012			0.973	0.993						1.291		1.085	0.0607511	5
0.0001	-4										1.181	0.998			1.139	1.07078						1.27		1.13176	0.0464745	5
GB1-ASA
				20160524	20160525	20160527																		Mean	SEM	N
Concentration (M)	Log M
Buffer				1.081	1.017	0.636																		0.911333	0.138901	3
1e-07	-7			1.155	1.114	0.7425																		1.00383	0.131202	3
3e-07	-6.52288			1.017	1.1835	0.711																		0.9705	0.138366	3
1e-06	-6			1.1035	1.097	0.699																		0.9665	0.133763	3
3e-06	-5.52288			1.038	1.209	0.7045																		0.983833	0.148133	3
1e-05	-5			1.133	1.0515	0.686																		0.956833	0.137445	3
3e-05	-4.52288			1.099	1.141	0.671																		0.970333	0.150157	3
0.0001	-4			1.112	1.114	0.7085																		0.978167	0.134835	3
GB2
		20160330	20160331										20160719											Mean	SEM	N
Concentration (M)	Log M
Buffer		1.067	1.1455										0.753											0.9885	0.119911	3
1e-07	-7	1.14	1.147										0.784											1.02367	0.11985	3
3e-07	-6.52288	1.1535	1.106										0.769333											1.00961	0.120919	3
1e-06	-6	1.15	1.111										0.781											1.014	0.117043	3
3e-06	-5.52288	1.10367	1.1505										0.858											1.03739	0.0907076	3
1e-05	-5	1.176	1.101										0.7375											1.00483	0.135409	3
3e-05	-4.52288	1.1435	1.16										0.768333											1.02394	0.127894	3
0.0001	-4	1.121	1.1495										0.807											1.02583	0.109726	3

## Sheet: Fig. 3 rac_%
GB1+GB2
		20160330	20160331	20160524	20160525	20160527	20160531	20160601	20160604	20160605	20160619	20160716	20160719	20160721	20170115	20170118	20170224	20170225	20170226	20170722	20170915	20170922		Mean	SEM	N
Concentration (M)	Log M
Buffer		0	0	0	0	0	0	0	0	0	0	0	0	0	0	0	0	0	0	0	0	0		0	0	21
1e-07	-7	1.63998	0.0510204	-0.629391	3.42293	3.9382	0.601828	1.45979	-0.187774	0.580311	-0.539447	0.947807	0.0714094	0.164159	1.09113	0.0678058	0.511897	3.00183	1.68691	0.790938	1.47228	1.46495		1.02898	0.269122	21
3e-07	-6.52288	1.49681	0.153061	0.29274	3.60415	1.50027	1.12326	4.69278	0.542458	1.92746	0.0866969	0.530772	0.0357047	0.109439	1.1271	0.745864	0.95279	2.54503	1.05713	1.01357	3.14457	1.90343		1.36119	0.27231	21
1e-06	-6	1.28856	0.884354	-0.204918	2.68298	1.33952	3.13318	5.64948	-0.146046	2.09326	0.375686	1.43645	4.02868	0.0820793	2.31415	5.56008	1.71568	2.72775	1.48448	0.995996	4.5775	1.4201		2.06852	0.374866	21
3e-06	-5.52288	3.63139	5.20408	-0.322014	2.03363	1.60743	2.1087	11.3402	3.54684	3.86528	1.13027	1.78188	5.39736	4.78796	2.1223	7.45412	2.02777	5.29888	17.1315	5.98574	7.98439	2.38178		4.59521	0.861521	21
1e-05	-5	13.0548	18.8095	51.1856	52.6226	44.6687	52.5245	50.1361	39.8289	36.4974	31.4035	33.6788	36.5884	11.9562	21.7566	31.3534	19.0046	23.4621	35.3464	31.5497	43.3289	32.7371		33.8806	2.74191	21
3e-05	-4.52288	84.3876	67.534	86.7096	82.0497	92.0611	71.9713	89.0969	82.1337	83.9862	79.0386	70.4031	65.8931	71.2722	54.2686	65.8937	60.9885	76.1942	78.3626	72.4558	73.8335	77.2983		75.5158	2.08445	21
0.0001	-4	100	100	100	100	100	100	100	100	100	100	100	100	100	100	100	100	100	100	100	100	100		100	1.20104e-15	21
GB1+ΔVGB2
							20160531	20160601	20160604	20160605												20170922		Mean	SEM	N
Concentration (M)	Log M
Buffer							1.18528	-0.0247423	0.396411	0.0621762												-0.0742472		0.308976	0.233954	5
1e-07	-7						-0.0137823	0.964948	0.104319	3.29534												0.825886		1.03534	0.596819	5
3e-07	-6.52288						0.441035	0.657045	1.2101	0.0829016												0.945965		0.667409	0.19559	5
1e-06	-6						0.0275647	-0.371134	2.98352	0.739206												2.98914		1.27366	0.721464	5
3e-06	-5.52288						0.59264	11.4117	1.81515	-0.0414508												6.28901		4.01341	2.1551	5
1e-05	-5						22.4859	53.457	19.0277	18.4525												16.1098		25.9066	6.96271	5
3e-05	-4.52288						68.8979	81.3856	64.0239	69.4197												36.4719		64.0398	7.46127	5
0.0001	-4						82.2392	96.9649	76.0171	85.1606												42.5198		76.5803	9.16955	5
ΔVGB1+ΔVGB2
									20160604	20160605												20170922		Mean	SEM	N
Concentration (M)	Log M
Buffer									0.0904096	0.953368												1.03121		0.691663	0.301465	3
1e-07	-7								0.563322	1.51295												0.987213		1.02116	0.27466	3
3e-07	-6.52288								0.709368	2.50777												1.73793		1.65169	0.520942	3
1e-06	-6								0.584185	1.98964												3.66011		2.07798	0.889042	3
3e-06	-5.52288								1.23096	2.40415												3.40896		2.34802	0.629359	3
1e-05	-5								8.23423	19.7858												16.3793		14.7998	3.42691	3
3e-05	-4.52288								28.7085	48.9534												33.7916		37.1512	6.08079	3
0.0001	-4								40.6426	68.8497												39.2859		49.5928	9.63645	3
ΔVGB1+GB2
		20160330	20160331					20160601	20160604	20160605			20160719							20170722		20170922		Mean	SEM	N
Concentration (M)	Log M
Buffer		-0.0780945	1.7602					0.602062	0.803255	1.26425			4.78443							2.52514		-0.0137495		1.45594	0.567257	8
1e-07	-7	1.35364	1.3322					1.87216	0.959733	4.20725			4.89155							2.12675		0.136578		2.10998	0.576115	8
3e-07	-6.52288	1.3211	1.66667					1.43505	7.28145	1.63731			4.9094							3.50942		3.01114		3.09644	0.744796	8
1e-06	-6	3.15632	2.70408					1.48454	0.897142	2.49396			4.82014							3.11102		7.69696		3.29552	0.753264	8
3e-06	-5.52288	7.24543	5.52721					2.7079	1.60651	3.21244			5.37356							3.81408		10.5789		5.00825	1.0173	8
1e-05	-5	10.4907	22.4036					23.4309	26.8621	45.4162			27.689							21.0741		16.8211		24.2735	3.59893	8
3e-05	-4.52288	41.1558	38.4864					38.8619	53.6546	76.9188			61.5311							40.994		35.8412		48.4305	5.11939	8
0.0001	-4	43.4075	48.0045					52.1237	64.1978	83.9067			103.288							65.5541		46.0269		63.3136	7.41918	8
GB2/1+GB2
													20160719				20170224	20170225	20170226		20170915			Mean	SEM	N
Concentration (M)	Log M
Buffer													4.89155				0.660513	1.60532	-0.359874		-0.555749			1.24835	0.989622	5
1e-07	-7												5.27537				0.819036	1.12242	-0.0899685		-0.428435			1.33969	1.02416	5
3e-07	-6.52288												5.62349				1.60174	0.904899	0.24179		-0.349881			1.60441	1.05637	5
1e-06	-6												6.94457				2.77415	1.13982	1.53696		-0.327473			2.41361	1.23621	5
3e-06	-5.52288												8.60484				11.6647	8.33116	17.0978		4.85129			10.1099	2.05341	5
1e-05	-5												44.8451				30.5124	38.5887	35.4101		25.8123			35.0337	3.27506	5
3e-05	-4.52288												80.1154				58.8121	89.8721	73.0994		69.6534			74.3105	5.19238	5
0.0001	-4												96.8044				98.9382	115.544	102.812		92.3498			101.29	3.94383	5
GB1/2+GB2
														20160721						20170722	20170915	20170922		Mean	SEM	N
Concentration (M)	Log M
Buffer														-0.738714						0.790938	-0.629299	1.88918		0.328026	0.626225	4
1e-07	-7													0.0820793						1.83966	-0.666756	1.2842		0.634797	0.568109	4
3e-07	-6.52288													0.246238						2.41383	0.19569	2.53815		1.34848	0.651546	4
1e-06	-6													0.437756						2.99385	-0.38487	1.37495		1.10542	0.724888	4
3e-06	-5.52288													0.766074						1.48814	1.88655	1.89468		1.50886	0.265153	4
1e-05	-5													1.17647						2.2322	3.08652	2.16784		2.16576	0.390609	4
3e-05	-4.52288													1.62791						1.74006	0.664546	2.14217		1.54367	0.313146	4
0.0001	-4													1.49111						1.74006	0.113382	2.133		1.36939	0.439021	4
GB1-TM7+GB2
											20160619	20160716			20170115	20170118						20170922		Mean	SEM	N
Concentration (M)	Log M
Buffer											-0.115596	1.27638			-0.515588	0.752644						0.516064		0.382781	0.316901	5
1e-07	-7										0.732107	1.34378			-0.455635	0.420396						0.27499		0.463127	0.294045	5
3e-07	-6.52288										0.0770639	2.28738			-0.635492	1.01709						0.296072		0.608421	0.495637	5
1e-06	-6										1.67614	1.6555			-0.695444	1.42392						2.34841		1.28171	0.517808	5
3e-06	-5.52288										2.13852	1.4533			-0.88729	0.528885						1.12287		0.871259	0.510772	5
1e-05	-5										0.732107	1.5544			-0.57554	1.08489						0.400568		0.639286	0.358985	5
3e-05	-4.52288										2.69724	1.47858			-0.383693	1.05777						0.288739		1.02773	0.525815	5
0.0001	-4										3.17888	1.12473			1.60671	2.11256						0.173244		1.63923	0.500473	5
GB1-ASA
				20160524	20160525	20160527																		Mean	SEM	N
Concentration (M)	Log M
Buffer				0.058548	-0.956408	-0.241114																		-0.379658	0.30107	3
1e-07	-7			2.22482	1.97322	2.61207																		2.27004	0.185802	3
3e-07	-6.52288			-1.81499	4.07228	1.76817																		1.34182	1.71283	3
1e-06	-6			0.717213	1.45978	1.44669																		1.20789	0.245369	3
3e-06	-5.52288			-1.20023	4.84244	1.59403																		1.74541	1.74601	3
1e-05	-5			1.5808	0.0855733	1.09841																		0.921593	0.440595	3
3e-05	-4.52288			0.58548	2.78868	0.696553																		1.35691	0.716607	3
0.0001	-4			0.966042	1.97322	1.7012																		1.54682	0.300819	3
GB2
		20160330	20160331										20160719											Mean	SEM	N
Concentration (M)	Log M
Buffer		-0.42952	0.0765306										0.571276											0.0727621	0.288911	3
1e-07	-7	0.52063	0.102041										1.1247											0.582457	0.29683	3
3e-07	-6.52288	0.696343	-0.595238										0.862864											0.321323	0.460795	3
1e-06	-6	0.650787	-0.510204										1.07114											0.403908	0.47289	3
3e-06	-5.52288	0.0477244	0.161565										2.44577											0.885021	0.781068	3
1e-05	-5	0.989197	-0.680272										0.294564											0.201163	0.484192	3
3e-05	-4.52288	0.566185	0.323129										0.845012											0.578109	0.150772	3
0.0001	-4	0.273331	0.144558										1.5353											0.651064	0.44368	3

## Sheet: Fig. 3 GABA_Raw
GB1+GB2
		20160607	20170722	20170915	20170922	20171223	20171225	20171227	20180112	20180113	20180114	20180831	20180902	20180904
Concentration (M)	Log M
Buffer		0.946	1.585	1.222	1.361	0.0986923	0.183257	0.22941	0.137026	0.177405	0.151769	0.906097	0.916795	0.460179
1e-09	-9	1.0535	1.83033	4.2465	1.5305	0.356549	0.247771	0.392639	0.392068	0.445722	0.173801	2.0901	0.920821	1.58628
1e-08	-8	1.974	6.779	9.1285	8.6005	3.06103	2.16633	2.11962	1.70446	2.26613	1.74382	21.414	14.0124	16.2359
1e-07	-7	4.18533	14.926	17.379	16.578	6.93908	6.28436	6.60735	5.11627	5.24505	3.74831	40.8758	31.4278	38.9898
1e-06	-6	5.19833	18.67	23.225	20.8165	8.58523	7.65297	8.329	6.77744	6.52656	4.94231	46.0205	38.3544	51.0199
1e-05	-5	5.84133	20.58	24.7395	22.243	9.9539	8.69828	8.39731	7.1992	6.97181	5.64136	47.2824	40.1076	51.4521
0.0001	-4	5.849	20.8123	24.9605	22.8087	9.98346	8.94605	8.40704	7.59774	7.26482	5.74077	46.9762	41.6332	53.9948
0.001	-3	5.896	20.6893	25.281	22.548	10.3576	9.19387	9.15342	7.61915	7.38913	5.81205	46.1547	42.0372	54.9024
GB1+ΔVGB2
					20170922							20180831	20180902	20180904
Concentration (M)	Log M
Buffer					1.512							0.820923	0.675385	0.858641
1e-09	-9				1.5255							2.24246	0.91141	0.674641
1e-08	-8				2.2905							1.41654	1.10603	1.14962
1e-07	-7				2.383							2.05269	1.23792	0.562154
1e-06	-6				2.504							3.81008	2.35485	1.42187
1e-05	-5				2.367							14.8599	9.62154	8.8
0.0001	-4				6.3935							22.0587	19.2223	22.9887
0.001	-3				6.55767							22.443	18.7634	28.5835
GB1/2+GB2
		20160607	20170722	20170915	20170922	20171223	20171225	20171227
Concentration (M)	Log M
Buffer		1.01	1.727	1.2515	1.382	0.239	0.2105	0.280538
1e-09	-9	1.054	1.733	1.258	1.86733	0.238615	0.231744	0.278778
1e-08	-8	1.08	1.784	4.041	3.6675	0.540654	0.460821	0.477231
1e-07	-7	1.04567	6.378	8.249	8.55933	4.95092	4.56454	5.27523
1e-06	-6	2.64167	13.45	12.051	14.661	8.98444	8.47056	9.23177
1e-05	-5	3.75333	16.2735	13.9855	17.097	10.7415	9.60569	10.2765
0.0001	-4	4.438	16.9275	15.0815	17.0467	10.8011	9.81831	10.1525
0.001	-3	4.505	16.7393	15.3005	17.1123	11.1691	9.79703	9.9649
GB1-TM7+GB2
					20170922	20171223	20171225	20171227	20180112	20180113	20180114
Concentration (M)	Log M
Buffer					1.295	0.051359	0.215256	0.24718	0.141128	0.245333	0.176846
1e-09	-9				1.432	0.16818	0.227334	0.227259	0.199557	0.247156	0.21209
1e-08	-8				1.828	0.200051	0.236616	0.230538	0.226743	0.301026	0.330641
1e-07	-7				2.9945	1.52244	1.24856	1.00994	1.4279	1.53462	1.319
1e-06	-6				4.99133	3.89823	3.04272	1.89013	3.31954	3.16995	2.96527
1e-05	-5				5.545	4.30074	3.41479	2.13454	3.79995	3.86338	3.25759
0.0001	-4				5.504	4.36703	3.69456	2.30959	3.89151	3.79085	3.47167
0.001	-3				5.557	4.41033	3.83662	2.14854	3.91295	3.80994	3.41474
GB1-DCRC+GB2
												20180831	20180902	20180904
Concentration (M)	Log M
Buffer												0.959333	1.19323	0.634795
1e-09	-9											2.2199	2.59382	3.0331
1e-08	-8											14.9896	20.7508	14.6125
1e-07	-7											36.9531	39.697	37.7469
1e-06	-6											44.4404	51.8335	50.4635
1e-05	-5											51.798	55.6694	58.3991
0.0001	-4											46.3528	54.5318	60.7858
0.001	-3											49.8439	57.1661	65.8569
GB2/1+GB2
												20180831	20180902	20180904
Concentration (M)	Log M
Buffer
1e-09	-9
1e-08	-8
1e-07	-7
1e-06	-6
1e-05	-5
0.0001	-4
0.001	-3											1.10604	0.996	0.6018
ΔVGB1+GB2
												20180831	20180902	20180904
Concentration (M)	Log M
Buffer
1e-09	-9
1e-08	-8
1e-07	-7
1e-06	-6
1e-05	-5
0.0001	-4
0.001	-3											1.095	1.05136	0.5256
ΔVGB1+ΔVGB2
												20180831	20180902	20180904
Concentration (M)	Log M
Buffer
1e-09	-9
1e-08	-8
1e-07	-7
1e-06	-6
1e-05	-5
0.0001	-4
0.001	-3											0.979333	1.09067	0.63795

## Sheet: Fig. 3 GABA_%
GB1+GB2
		20160607	20170722	20170915	20170922	20171223	20171225	20171227	20180112	20180113	20180114	20180831	20180902	20180904			Mean	SEM	N
Concentration (M)	Log M
Buffer		0	0	0	0	0	0	0	0	0	0	0	0	0			0	0	13
1e-09	-9	2.17172	1.28418	12.5712	0.800019	2.5135	0.715985	1.82909	3.40869	3.72057	0.38925	2.61667	0.00978996	2.06844			2.62301	0.886193	13
1e-08	-8	20.7677	27.1875	32.863	34.1695	28.8758	22.0082	21.1811	20.9491	28.9629	28.1267	45.3227	31.8469	28.9771			28.5568	1.89517	13
1e-07	-7	65.4411	69.8323	67.1557	71.8223	66.6777	67.7102	71.4694	66.5485	70.2696	63.5399	88.3336	74.1992	70.7717			70.2901	1.71277	13
1e-06	-6	85.9057	89.43	91.4543	91.8275	82.7239	82.8991	90.7617	88.7503	88.0394	84.6343	99.7036	91.0439	92.8687			89.234	1.28237	13
1e-05	-5	98.8956	99.4277	97.7493	98.5604	96.0652	94.4999	91.5272	94.3873	94.2133	96.9844	102.492	95.3075	93.6625			96.4441	0.817688	13
0.0001	-4	99.0505	100.644	98.6679	101.23	96.3534	97.2497	91.6362	99.7139	98.2763	98.7407	101.816	99.0175	98.3331			98.5176	0.709507	13
0.001	-3	100	100	100	100	100	100	100	100	100	100	100	100	100			100	2.27556e-15	13
GB1+ΔVGB2
					20170922							20180831	20180902	20180904			Mean	SEM	N
Concentration (M)	Log M
Buffer					0.712701							-0.188237	-0.587082	0.731899			0.16732	0.330622	4
1e-09	-9				0.77642							2.95339	-0.0130957	0.393926			1.02766	0.661837	4
1e-08	-8				4.38712							1.12808	0.460187	1.26636			1.81044	0.876742	4
1e-07	-7				4.82371							2.53399	0.780946	0.187308			2.08149	1.04099	4
1e-06	-6				5.39482							6.41784	3.49718	1.76645			4.26907	1.03051	4
1e-05	-5				4.74819							30.8381	21.1689	15.3187			18.0185	5.45937	4
0.0001	-4				23.7528							46.7476	44.5168	41.3807			39.0995	5.23264	4
0.001	-3				24.5276							47.5969	43.4009	51.6572			41.7957	5.99769	4
GB1/2+GB2
		20160607	20170722	20170915	20170922	20171223	20171225	20171227									Mean	SEM	N
Concentration (M)	Log M
Buffer		1.29293	0.743287	0.122615	0.0991174	1.36767	0.302347	0.572926									0.642985	0.197916	7
1e-09	-9	2.18182	0.774693	0.149632	2.38983	1.36392	0.53811	0.553197									1.13589	0.327994	7
1e-08	-8	2.70707	1.04165	11.717	10.8864	4.30809	3.08041	2.77701									5.21681	1.61445	7
1e-07	-7	2.01347	25.0885	29.2074	33.9752	47.2979	48.6236	56.5421									34.6783	6.93701	7
1e-06	-6	34.2559	62.1063	45.0102	62.7743	86.6152	91.9727	100.878									69.0875	9.4152	7
1e-05	-5	56.7138	76.8857	53.0508	74.272	103.743	104.57	112.585									83.1172	9.09237	7
0.0001	-4	70.5455	80.309	57.6063	74.0344	104.324	106.93	111.196									86.4206	7.91024	7
0.001	-3	71.899	79.3241	58.5166	74.3443	107.911	106.694	109.093									86.8259	7.8246	7
GB1-TM7+GB2
					20170922	20171223	20171225	20171227	20180112	20180113	20180114						Mean	SEM	N
Concentration (M)	Log M
Buffer					-0.311512	-0.461389	0.355129	0.199118	0.0548329	0.941915	0.443046						0.174449	0.179228	7
1e-09	-9				0.335111	0.677339	0.489167	-0.024111	0.835738	0.967189	1.06569						0.620875	0.144927	7
1e-08	-8				2.20418	0.988013	0.592179	0.0126419	1.19909	1.71416	3.16012						1.41006	0.397318	7
1e-07	-7				7.70992	13.8782	11.8228	8.74636	17.2527	18.8195	20.6214						14.1216	1.88647	7
1e-06	-6				17.1347	37.0366	31.7344	18.6095	42.5349	41.4955	49.706						34.036	4.65821	7
1e-05	-5				19.748	40.9602	35.8637	21.3483	48.9556	51.1109	54.8704						38.9796	5.33086	7
0.0001	-4				19.5544	41.6063	38.9686	23.3099	50.1794	50.1051	58.6525						40.3395	5.46214	7
0.001	-3				19.8046	42.0284	40.5451	21.5052	50.4659	50.3698	57.6469						40.338	5.52484	7
GB1-DCRC+GB2
												20180831	20180902	20180904			Mean	SEM	N
Concentration (M)	Log M
Buffer												0.117652	0.67226	0.320736			0.370216	0.162002	3
1e-09	-9											2.90352	4.07833	4.72597			3.90261	0.533384	3
1e-08	-8											31.1247	48.2341	25.9951			35.118	6.72319	3
1e-07	-7											79.6644	94.3091	68.4887			80.8207	7.4761	3
1e-06	-6											96.2115	123.823	91.8466			103.961	10.0111	3
1e-05	-5											112.472	133.152	106.423			117.349	8.09224	3
0.0001	-4											100.438	130.386	110.807			113.877	8.78035	3
0.001	-3											108.153	136.792	120.121			121.689	8.30426	3
GB2/1+GB2
												20180831	20180902	20180904			Mean	SEM	N
Concentration (M)	Log M
Buffer																	#DIV/0!	#DIV/0!	0
1e-09	-9																#DIV/0!	#DIV/0!	0
1e-08	-8																#DIV/0!	#DIV/0!	0
1e-07	-7																#DIV/0!	#DIV/0!	0
1e-06	-6																#DIV/0!	#DIV/0!	0
1e-05	-5																#DIV/0!	#DIV/0!	0
0.0001	-4																#DIV/0!	#DIV/0!	0
0.001	-3											0.441883	0.192617	0.26013			0.29821	0.0744333	3
ΔVGB1+GB2
												20180831	20180902	20180904			Mean	SEM	N
Concentration (M)	Log M
Buffer																	#DIV/0!	#DIV/0!	0
1e-09	-9																#DIV/0!	#DIV/0!	0
1e-08	-8																#DIV/0!	#DIV/0!	0
1e-07	-7																#DIV/0!	#DIV/0!	0
1e-06	-6																#DIV/0!	#DIV/0!	0
1e-05	-5																#DIV/0!	#DIV/0!	0
0.0001	-4																#DIV/0!	#DIV/0!	0
0.001	-3											0.417478	0.327242	0.120165			0.288295	0.0880081	3
ΔVGB1+ΔVGB2
												20180831	20180902	20180904			Mean	SEM	N
Concentration (M)	Log M
Buffer																	#DIV/0!	#DIV/0!	0
1e-09	-9																#DIV/0!	#DIV/0!	0
1e-08	-8																#DIV/0!	#DIV/0!	0
1e-07	-7																#DIV/0!	#DIV/0!	0
1e-06	-6																#DIV/0!	#DIV/0!	0
1e-05	-5																#DIV/0!	#DIV/0!	0
0.0001	-4																#DIV/0!	#DIV/0!	0
0.001	-3											0.161852	0.422836	0.326531			0.30374	0.0761964	3

## Sheet: Fig. 3S1A_Raw
pRK
		20170115	20170224	20170225	20170424	20170426	20170430	20170505	20170603	20170722	20170726	20170915	20170922	20171223	20171225	20171227				20211111	20211112	20211113	20211114
HA	Surface	30186.7	9735.5	11163	3526.67	10190	1420	1560	4193.33	3454.98	79223.5	3406.23	1618.99	12335.6	4405.19	5350.53				21297.7	20791	2747	4486.5
	Total	27106.3	12843.7	11552.7	3033.33	14946.7	1686.67	1880	6486.67	3692.58	80940.3	5913.98	2551.3	14719.5	9160.34	6780.1				23080	19213.7	2822.33	4537.67
Flag	Surface	12132	32916	33066	990	2050	833.333	1680	4353.33	5617.14	129628	4003.12	3131.9	12802	10974.2	11959.4				12048.7	15155.3	2227	3746.5
	Total	13323	35276	41860	1540	2966.67	690	2073.33	5086.67	7788.38	374650	4678.04	10618.3	13066.8	15082.9	19098.6				13773.3	15133	1460	3340
GB1+GB2
		20170115	20170224	20170225	20170424	20170426	20170430	20170505	20170603	20170722	20170726	20170915	20170922	20171223	20171225	20171227	20180831	20180902	20180904	20211111	20211112	20211113	20211114
HA	Surface	631403	1.0699e+06	1195501	123900	122380	23310	31160	114870	186581	5125444	122439	138030	350688	362150	302323	43002	33996.3	44797.1	761787	765640	133360	138047
	Total	634871	1104043	1.19389e+06	133600	173613	25100	31020	125727	187377	4909577	114302	161607	331492	321092	288714	32802.4	25208.9	29665.4	728720	738333	134000	139084
Flag	Surface	199270	1058732	1194889	12100	54050	16580	36880	60780	305465	8.49255e+06	177620	262679	338957	386799	405669	121979	181640	64308.9	121573	126080	25071	26600
	Total	158992	1093842	1.23777e+06	20430	45930	9360	24680	42846.7	327711	8665631	156961	265797	278411	322121	360230	124176	170487	67216.6	125000	127014	25120	26973
GB1/2+GB2
														20171223	20171225	20171227
HA	Surface													155762	190042	142962
	Total													155647	196229	152203
Flag	Surface													446660	466082	506275
	Total													363810	423123	445101
GB1-TM7+GB2
		20170115												20171223	20171225
HA	Surface	287353												145369	172083
	Total	359899												201110	199135
Flag	Surface	92323.3												151459	213524
	Total	71607												146376	205290
GB2/1+GB2
			20170224	20170225								20170915
HA	Surface		302133	343033								48277.8
	Total		471011	580094								48895.8
Flag	Surface		1.46874e+06	1.56544e+06								122468
	Total		1483088	1606201								129660
ΔVGB1+GB2
								20170505	20170603		20170726
HA	Surface							3380	23826.7		217563
	Total							11200	74733.3		853593
Flag	Surface							27953.3	49593.3		13404863
	Total							26360	51186.7		12565618
GB1+ΔVGB2
								20170505	20170603				20170922
HA	Surface							10146.7	58493.3				46153.7
	Total							11680	60900				68319.9
Flag	Surface							16213.3	31546.7				124165
	Total							16360	27226.7				132136
ΔVGB1+ΔVGB2
								20170505	20170603				20170922
HA	Surface							4093.33	14650				22318.2
	Total							15966.7	58300				66390.8
Flag	Surface							10006.7	12680				36692.4
	Total							9853.33	17613.3				94372.8
GB1a
																				20211111	20211112	20211113	20211114
HA	Surface																			39267	47613	7640	10067
	Total																			739610	726767	135100	140016
Flag	Surface																			16127	18880	2293	3967
	Total																			16457.7	20540	2293	3467
GB1-ASA
					20170424	20170426	20170430
HA	Surface				144327	139980	25973.3
	Total				121660	168480	24940
Flag	Surface				1840	3146.67	1150
	Total				1793.33	4260	890
GB2
					20170424	20170426	20170430
HA	Surface				23753.3	10200	586.667
	Total				26680	14110	850
Flag	Surface				14926.7	78980	21100
	Total				26233.3	70640	13440
GB1-DCRC+GB2
																	20180831	20180902	20180904
HA	Surface																22275.7	16352.5	20289.1
	Total																22863.8	16923.3	19965.5
Flag	Surface																65503.8	83324.4	24635.6
	Total																66966.8	85363.7	26065.3

## Sheet: Fig. 3S1A_%
pRK
		20170115	20170224	20170225	20170424	20170426	20170430	20170505	20170603	20170722	20170726	20170915	20170922	20171223	20171225	20171227				20211111	20211112	20211113	20211114			Mean	SEM	N
HA	Surface	4.78088	0.909946	0.933751	2.84638	8.32652	6.09181	5.00642	3.6505	1.85173	1.54569	2.78199	1.17293	3.51755	1.2164	1.76981				2.79575	2.71551	2.05984	3.24998			3.01176	0.442815	19
	Total	4.26958	1.16333	0.967646	2.27046	8.60917	6.71979	6.06061	5.15934	1.97067	1.64862	5.174	1.57871	4.44039	2.85288	2.34837				3.1672	2.6023	2.10622	3.26253			3.49325	0.476224	19
Flag	Surface	6.08822	3.109	2.76729	8.18182	3.79278	5.02614	4.55531	7.16244	1.83888	1.52637	2.25376	1.19229	3.77689	2.83719	2.94808				9.91064	12.0204	8.88277	14.0846			5.36605	0.853518	19
	Total	8.37967	3.22496	3.38188	7.53793	6.4591	7.37179	8.40086	11.8718	2.3766	4.3234	2.98038	3.9949	4.69334	4.68238	5.30179				11.0187	11.9145	5.8121	12.3828			6.63731	0.747616	19
GB1+GB2
		20170115	20170224	20170225	20170424	20170426	20170430	20170505	20170603	20170722	20170726	20170915	20170922	20171223	20171225	20171227	20180831	20180902	20180904	20211111	20211112	20211113	20211114			Mean	SEM	N
HA	Surface	100	100	100	100	100	100	100	100	100	100	100	100	100	100	100	100	100	100	100	100	100	100			100	1.14514e-15	22
	Total	100	100	100	100	100	100	100	100	100	100	100	100	100	100	100	100	100	100	100	100	100	100			100	6.61149e-16	22
Flag	Surface	100	100	100	100	100	100	100	100	100	100	100	100	100	100	100	100	100	100	100	100	100	100			100	9.35006e-16	22
	Total	100	100	100	100	100	100	100	100	100	100	100	100	100	100	100	100	100	100	100	100	100	100			100	6.61149e-16	22
GB1/2+GB2
														20171223	20171225	20171227										Mean	SEM	N
HA	Surface													44.4161	52.476	47.288										48.06	2.35847	3
	Total													46.9534	61.113	52.7175										53.5947	4.11098	3
Flag	Surface													131.775	120.497	124.8										125.691	3.28585	3
	Total													130.674	131.355	123.56										128.53	2.4925	3
GB1-TM7+GB2
		20170115												20171223	20171225											Mean	SEM	N
HA	Surface	45.5102												41.4526	47.517											44.8266	1.78372	3
	Total	56.6885												60.668	62.0182											59.7916	1.59975	3
Flag	Surface	46.3308												44.6838	55.2027											48.7391	3.26657	3
	Total	45.0381												52.5756	63.7308											53.7815	5.42971	3
GB2/1+GB2
			20170224	20170225								20170915														Mean	SEM	N
HA	Surface		28.2394	28.6936								39.4302														32.1211	3.65689	3
	Total		42.6623	48.5884								42.7778														44.6762	1.95641	3
Flag	Surface		138.726	131.012								68.9497														112.896	22.0856	3
	Total		135.585	129.765								82.6068														115.986	16.7738	3
ΔVGB1+GB2
								20170505	20170603		20170726															Mean	SEM	N
HA	Surface							10.8472	20.7423		4.24476															11.9448	4.79394	3
	Total							36.1057	59.4411		17.3863															37.6444	12.1645	3
Flag	Surface							75.7954	81.5948		157.843															105.078	26.4356	3
	Total							106.807	119.465		145.005															123.759	11.2339	3
GB1+ΔVGB2
								20170505	20170603				20170922													Mean	SEM	N
HA	Surface							32.5631	50.9213				33.4375													38.974	5.97901	3
	Total							37.6531	48.4384				42.2753													42.7889	3.12402	3
Flag	Surface							43.9624	51.903				47.2687													47.7114	2.30293	3
	Total							66.2885	63.5444				49.713													59.8486	5.12936	3
ΔVGB1+ΔVGB2
								20170505	20170603				20170922													Mean	SEM	N
HA	Surface							13.1365	12.7535				16.1691													14.0197	1.08037	3
	Total							51.4722	46.3704				41.0816													46.3081	2.99965	3
Flag	Surface							27.133	20.8621				13.9685													20.6546	3.80169	3
	Total							39.9244	41.1078				35.5056													38.8459	1.70476	3
GB1a
																				20211111	20211112	20211113	20211114			Mean	SEM	N
HA	Surface																			5.15459	6.21872	5.72885	7.29244			6.09865	0.453464	4
	Total																			101.494	98.4335	100.821	100.67			100.355	0.665003	4
Flag	Surface																			13.2653	14.9746	9.14603	14.9135			13.0749	1.36814	4
	Total																			13.1662	16.1715	9.12818	12.8536			12.8299	1.44288	4
GB1-ASA
					20170424	20170426	20170430																			Mean	SEM	N
HA	Surface				116.486	114.381	111.426																			114.098	1.46776	3
	Total				91.0629	97.0432	99.3625																			95.8229	2.47239	3
Flag	Surface				15.2066	5.82177	6.93607																			9.32148	2.96009	3
	Total				8.77794	9.27498	9.50855																			9.18716	0.215431	3
GB2
					20170424	20170426	20170430																			Mean	SEM	N
HA	Surface				19.1714	8.3347	2.5168																			10.0076	4.87998	3
	Total				19.9701	8.12726	3.38645																			10.4946	4.93144	3
Flag	Surface				123.361	146.124	127.262																			132.249	7.02834	3
	Total				128.406	153.799	143.59																			141.932	7.37715	3
GB1-DCRC+GB2
																	20180831	20180902	20180904							Mean	SEM	N
HA	Surface																51.8016	48.1008	45.2911							48.3978	1.88529	3
	Total																69.7015	67.1324	67.3023							68.0454	0.829512	3
Flag	Surface																53.7011	45.8733	38.3083							45.9609	4.44373	3
	Total																53.9288	50.0706	38.778							47.5925	4.54579	3

## Sheet: Fig. 3S1D_Raw
GABA dose
		20171223	20171225	20171227
Concentration (M)	Log M
Buffer		0.239	0.2105	0.280538
1e-09	-9	0.238615	0.231744	0.278778
1e-08	-8	0.540654	0.460821	0.477231
1e-07	-7	4.95092	4.56454	5.27523
1e-06	-6	8.98444	8.47056	9.23177
1e-05	-5	10.7415	9.60569	10.2765
0.0001	-4	10.8011	9.81831	10.1525
0.001	-3	11.1691	9.79703	9.9649
GABA dose + rac-BHFF 10 μM
		20171223	20171225	20171227
Concentration (M)	Log M
Buffer		0.278885	0.239872	0.212769
1e-09	-9	0.285958	0.215974	0.264571
1e-08	-8	0.695821	0.596231	0.246641
1e-07	-7	4.88169	3.89238	4.63973
1e-06	-6	8.8829	7.59221	8.18773
1e-05	-5	10.4766	9.1289	9.84112
0.0001	-4	10.7246	9.02946	9.979
0.001	-3	10.8768	9.17188	10.0453
GABA dose + rac-BHFF 20 μM
		20171223	20171225	20171227
Concentration (M)	Log M
Buffer		0.278577	0.276513	0.354333
1e-09	-9	0.334157	0.232872	0.341111
1e-08	-8	0.786462	0.222359	0.545769
1e-07	-7	4.40151	3.68423	4.33505
1e-06	-6	8.92297	7.88319	8.72974
1e-05	-5	10.9562	9.24158	10.0678
0.0001	-4	11.5894	9.68273	10.1167
0.001	-3	11.0451	9.63677	9.93131

## Sheet: Fig. 3S1D_%
GABA dose
		20171223	20171225	20171227			Mean	SEM	N
Concentration (M)	Log M
Buffer		0	0	0			0	0	3
1e-09	-9	-0.00352238	0.221599	-0.0181805			0.0666321	0.077599	3
1e-08	-8	2.75985	2.61117	2.03103			2.46735	0.222341	3
1e-07	-7	43.1096	45.4183	51.5748			46.7009	2.52645	3
1e-06	-6	80.0124	86.1633	92.4298			86.2018	3.58464	3
1e-05	-5	96.0882	98.0041	103.217			99.1033	2.13015	3
0.0001	-4	96.6333	100.222	101.938			99.5976	1.56272	3
0.001	-3	100	100	100			100	0	3
GABA dose + rac-BHFF 10 μM
		20171223	20171225	20171227			Mean	SEM	N
Concentration (M)	Log M
Buffer		0.364905	0.306388	-0.699778			-0.00949482	0.345555	3
1e-09	-9	0.429621	0.0571045	-0.164881			0.107281	0.173442	3
1e-08	-8	4.17947	4.02368	-0.350021			2.61771	1.48455	3
1e-07	-7	42.4762	38.4069	45.0127			41.9653	1.92398	3
1e-06	-6	79.0834	77.0008	81.6491			79.2445	1.34425	3
1e-05	-5	93.6639	93.0306	98.7219			95.1388	1.80085	3
0.0001	-4	95.9336	91.9933	100.146			96.0242	2.35381	3
0.001	-3	97.3257	93.479	100.831			97.2118	2.12303	3
GABA dose + rac-BHFF 20 μM
		20171223	20171225	20171227			Mean	SEM	N
Concentration (M)	Log M
Buffer		0.362092	0.688602	0.761999			0.604231	0.122909	3
1e-09	-9	0.870596	0.233369	0.625469			0.576478	0.185575	3
1e-08	-8	5.00875	0.123705	2.73876			2.62374	1.41136	3
1e-07	-7	38.083	36.2356	41.8666			38.7284	1.65727	3
1e-06	-6	79.4501	80.0362	87.2459			82.2441	2.50663	3
1e-05	-5	98.0522	94.2059	101.063			97.7736	1.98425	3
0.0001	-4	103.845	98.8078	101.567			101.407	1.45639	3
0.001	-3	98.8655	98.3283	99.6532			98.949	0.384723	3

## Sheet: Fig. 3S1E_Raw
GB1+GB2
		20180831	20180902	20180904
Concentration (M)	Log M
Basal		0.906097	0.916795	0.460179
1e-08	-8	21.414	14.0124	16.2359
1e-07	-7	40.8758	31.4278	38.9898
1e-06	-6	46.0205	38.3544	51.0199
1e-05	-5	47.2824	40.1076	51.4521
0.0001	-4	46.9762	41.6332	53.9948
0.001	-3	46.1547	42.0372	54.9024
1e-09	-9	2.0901	0.920821	1.58628
GB1-DCRC+GB2
		20180831	20180902	20180904
Concentration (M)	Log M
Basal		0.959333	1.19323	0.634795
1e-08	-8	14.9896	20.7508	14.6125
1e-07	-7	36.9531	39.697	37.7469
1e-06	-6	44.4404	51.8335	50.4635
1e-05	-5	51.798	55.6694	58.3991
0.0001	-4	46.3528	54.5318	60.7858
0.001	-3	49.8439	57.1661	65.8569
1e-09	-9	2.2199	2.59382	3.0331

## Sheet: Fig. 3S1E_%
GB1+GB2
		20180831	20180902	20180904		Mean	SEM	N
Concentration (M)	Log M
Basal		0	0	0		0	0	3
1e-08	-8	45.3227	31.8469	28.9771		35.3822	5.03882	3
1e-07	-7	88.3336	74.1992	70.7717		77.7682	5.37459	3
1e-06	-6	99.7036	91.0439	92.8687		94.5387	2.63563	3
1e-05	-5	102.492	95.3075	93.6625		97.1541	2.71105	3
0.0001	-4	101.816	99.0175	98.3331		99.722	1.06523	3
0.001	-3	100	100	100		100	8.20464e-15	3
1e-09	-9	2.61667	0.00978996	2.06844		1.56497	0.79353	3
GB1-DCRC+GB2
		20180831	20180902	20180904		Mean	SEM	N
Concentration (M)	Log M
Basal		0.117652	0.67226	0.320736		0.370216	0.162002	3
1e-08	-8	31.1247	48.2341	25.9951		35.118	6.72319	3
1e-07	-7	79.6644	94.3091	68.4887		80.8207	7.4761	3
1e-06	-6	96.2115	123.823	91.8466		103.961	10.0111	3
1e-05	-5	112.472	133.152	106.423		117.349	8.09224	3
0.0001	-4	100.438	130.386	110.807		113.877	8.78035	3
0.001	-3	108.153	136.792	120.121		121.689	8.30426	3
1e-09	-9	2.90352	4.07833	4.72597		3.90261	0.533384	3

[truncated: 6 more sheets: Fig. 3S1F_Raw, Fig. 3S1F_%, Fig. 3S2A BRET, Fig. 3S2A ΔBRET, Fig. 3S2B_Raw, Fig. 3S2B_%]
