# Supplementary material for: Allosteric ligands control the activation of a class C GPCR heterodimer by acting at the transmembrane interface
Source: eLife. 2021 Dec 6;10:e70188. doi: 10.7554/eLife.70188 (PMC8700296; doi:10.7554/eLife.70188)
Supplement: Figure 4—source data 1. [file elife-70188-fig4-data1.xlsx]

## Sheet: Fig. 4B-C rac_Raw
	WT
	GB1 + GB2		20200603	20200605	20200610	20200611				Mean	SEM	N
	rac-BHFF (M)	Log M
Buffer	Buffer		3.4	3.3345	2.29767	1.73				2.69054	0.407738	4
EC20 GABA	Buffer	-14	3.003	3.82922	4.03111	13.36				6.05583	2.44486	4
	3.17e-07	-6.49894	2.95356	3.608	4.25467	14.07				6.22156	2.62959	4
	1e-06	-6	2.92067	4.04289	4.57567	14.49				6.50731	2.68316	4
	3.17e-06	-5.49894	3.79983	4.79444	5.12344	15.5133				7.30776	2.74962	4
	1e-05	-5	11.3501	15.028	12.0986	21.8867				15.0908	2.40024	4
	3.16e-05	-4.50031	16.516	21.4167	16.5798	29.6133				21.0314	3.08226	4
	0.0001	-4	21.0367	25.235	19.229	33.4433				24.736	3.16332	4
	GB1-1
	GB1-M807A + GB2		20200603	20200605	20200610	20200611				Mean	SEM	N
	rac-BHFF (M)	Log M
Buffer	Buffer		3.86533	4.417	2.20667	2.21				3.17475	0.569211	4
EC20 GABA	Buffer	-14	3.77567	4.52967	4.78367	9.735				5.706	1.35995	4
	3.17e-07	-6.49894	3.843	4.51033	4.67367	9.52				5.63675	1.30683	4
	1e-06	-6	4.32833	3.76033	4.693	9.365				5.53667	1.29046	4
	3.17e-06	-5.49894	5.53	6.19983	4.98122	10.7533				6.8661	1.31948	4
	1e-05	-5	9.90744	13.5024	9.95889	20.2333				13.4005	2.42803	4
	3.16e-05	-4.50031	18.2632	21.4766	16.3778	32.6833				22.2002	3.64944	4
	0.0001	-4	22.3633	27.6556	18.5867	36.95				26.3889	3.98143	4
	GB1-2
	GB1-Y810A + GB2		20200603	20200605	20200610	20200611				Mean	SEM	N
	rac-BHFF (M)	Log M
Buffer	Buffer		3.13217	3.296	2.105	2.32				2.71329	0.29435	4
EC20 GABA	Buffer	-14	3.72511	5.92844	4.73233	8.57				5.73897	1.04561	4
	3.17e-07	-6.49894	3.462	6.0505	4.11444	8.35667				5.4959	1.10063	4
	1e-06	-6	3.82383	6.02056	4.70578	7.79				5.58504	0.862481	4
	3.17e-06	-5.49894	4.12867	6.173	4.47978	8.485				5.81661	0.995138	4
	1e-05	-5	4.83667	6.192	4.75389	8.18				5.99064	0.800783	4
	3.16e-05	-4.50031	7.67989	11.2202	5.2455	12.9733				9.27974	1.73788	4
	0.0001	-4	11.2179	14.0913	10.6227	23.2633				14.7988	2.92136	4
	GB1-3
	GB1-N811A + GB2		20200603	20200605	20200610	20200611				Mean	SEM	N
	rac-BHFF (M)	Log M
Buffer	Buffer		3.11317	3.01367	1.8675	1.8				2.44858	0.355822	4
EC20 GABA	Buffer	-14	3.86633	5.35433	3.79089	8.58333				5.39872	1.1209	4
	3.17e-07	-6.49894	4.017	5.41733	4.03933	9.355				5.70717	1.25927	4
	1e-06	-6	5.10678	5.50533	3.96633	8.64				5.80461	0.999801	4
	3.17e-06	-5.49894	6.55433	6.10522	4.49211	9.75667				6.72708	1.10265	4
	1e-05	-5	11.1601	12.7401	11.1176	15.55				12.6419	1.04027	4
	3.16e-05	-4.50031	19.2655	25.9035	16.5716	35.91				24.4126	4.30492	4
	0.0001	-4	21.531	30.171	19.5656	38.3633				27.4077	4.31757	4
	GB1-20
	GB1-K792A + GB2		20200603	20200605	20200610	20200611				Mean	SEM	N
	rac-BHFF (M)	Log M
Buffer	Buffer		6.38478	5.00156	2.2175	3.99533				4.39979	0.876939	4
EC20 GABA	Buffer	-14	10.6553	6.41033	2.91722	19.4013				9.84606	3.55635	4
	3.17e-07	-6.49894	9.74617	6.421	5.84867	19.642				10.4145	3.19359	4
	1e-06	-6	9.037	6.51333	5.936	19.4156				10.2255	3.13647	4
	3.17e-06	-5.49894	10.2909	6.55733	5.40233	19.5387				10.4473	3.20496	4
	1e-05	-5	11.323	6.59467	6.12044	19.938				10.994	3.20428	4
	3.16e-05	-4.50031	16.0423	12.1569	10.2519	24.3477				15.6997	3.1243	4
	0.0001	-4	21.4578	22.6738	15.1813	28.9953				22.0771	2.83068	4
	GB2-9
	GB1 + GB2-M694A		20200603	20200605	20200610	20200611				Mean	SEM	N
	rac-BHFF (M)	Log M
Buffer	Buffer		5.39311	4.40956	3.84922	3.20217				4.21351	0.464167	4
EC20 GABA	Buffer	-14	9.34067	11.4017	7.89117	15.9977				11.1578	1.76674	4
	3.17e-07	-6.49894	8.92044	10.539	8.39833	15.9092				10.9417	1.71736	4
	1e-06	-6	8.551	10.7443	8.75	16.5037				11.1372	1.85608	4
	3.17e-06	-5.49894	7.918	9.58867	8.46617	16.3852				10.5895	1.96292	4
	1e-05	-5	8.96933	10.102	9.02583	17.2833				11.3451	1.99648	4
	3.16e-05	-4.50031	9.75644	11.1766	11.4128	18.4294				12.6938	1.94655	4
	0.0001	-4	17.5213	18.4802	14.9699	28.5431				19.8786	2.98163	4
	GB2-10
	GB1 + GB2-Y697A		20200603	20200605	20200610	20200611				Mean	SEM	N
	rac-BHFF (M)	Log M
Buffer	Buffer		2.66233	4.82944	3.23467	3.19283				3.47982	0.468351	4
EC20 GABA	Buffer	-14	8.10233	6.12611	5.03267	8.11733				6.84461	0.763821	4
	3.17e-07	-6.49894	10.7053	6.49389	5.16733	8.74033				7.77672	1.22338	4
	1e-06	-6	6.34867	6.37011	5.06017	9.33467				6.7784	0.905456	4
	3.17e-06	-5.49894	10.0265	7.02633	5.27167	9.50022				7.95618	1.10836	4
	1e-05	-5	10.392	9.86656	7.784	14.2883				10.5827	1.3575	4
	3.16e-05	-4.50031	16.6563	16.9593	12.4229	22.2938				17.0831	2.02209	4
	0.0001	-4	22.2613	30.5712	18.4921	36.1303				26.8637	3.98833	4
	GB2-11
	GB1 + GB2-N698A		20200603	20200605	20200610	20200611				Mean	SEM	N
	rac-BHFF (M)	Log M
Buffer	Buffer		2.78056	4.40011	3.69844	2.53983				3.35474	0.428631	4
EC20 GABA	Buffer	-14	11.329	14.8107	8.07067	17.6827				12.9733	2.08753	4
	3.17e-07	-6.49894	10.9677	14.0047	7.504	17.5235				12.5	2.13712	4
	1e-06	-6	11.5844	14.5648	7.83033	17.4826				12.8655	2.06557	4
	3.17e-06	-5.49894	10.969	15.496	8.235	17.622				13.0805	2.12911	4
	1e-05	-5	11.009	13.7287	8.276	17.8488				12.7156	2.04122	4
	3.16e-05	-4.50031	11.0543	18.295	8.83983	23.358				15.3868	3.33705	4
	0.0001	-4	14.5889	22.9166	13.9217	29.8126				20.3099	3.77088	4
	GB2-22
	GB1 + GB2-S695A		20200603	20200605	20200610	20200611				Mean	SEM	N
	rac-BHFF (M)	Log M
Buffer	Buffer		5.7295	6.2575	2.78467	3.13783				4.47737	0.884887	4
EC20 GABA	Buffer	-14	5.51583	6.759	4.791	10.626				6.92296	1.29951	4
	3.17e-07	-6.49894	6.24978	6.955	5.52067	11.8035				7.63224	1.42092	4
	1e-06	-6	5.946	7.12933	5.48417	11.6462				7.55142	1.40819	4
	3.17e-06	-5.49894	6.47478	8.46033	6.49683	12.037				8.36724	1.3088	4
	1e-05	-5	12.1365	22.859	13.2197	28.7154				19.2327	3.97477	4
	3.16e-05	-4.50031	17.118	33.5906	23.8329	43.594				29.5339	5.77927	4
	0.0001	-4	23.3976	41.0581	27.5011	48.249				35.0514	5.79566	4

## Sheet: Fig. 4B-C rac_%
	WT
	GB1 + GB2		20200603	20200605	20200610	20200611								Mean	SEM	N
	rac-BHFF (M)	Log M
Buffer	Buffer		0	0	0	0								0	0	4
EC20 GABA	Buffer	-14	-2.25099	2.25895	10.2381	36.6723								11.7296	8.7059	4
	3.17e-07	-6.49894	-2.53134	1.24883	11.5585	38.9111								12.2968	9.35769	4
	1e-06	-6	-2.71782	3.23458	13.4543	40.2354								13.5516	9.50075	4
	3.17e-06	-5.49894	2.26706	6.66626	16.6896	43.4623								17.2713	9.23715	4
	1e-05	-5	45.0772	53.3938	57.8861	63.559								54.979	3.90113	4
	3.16e-05	-4.50031	74.3678	82.5651	84.3531	87.9231								82.3023	2.86973	4
	0.0001	-4	100	100	100	100								100	0	4
	GB1-1
	GB1-M807A + GB2		20200603	20200605	20200610	20200611								Mean	SEM	N
	rac-BHFF (M)	Log M
Buffer	Buffer		0	0	0	0								0	0	4
EC20 GABA	Buffer	-14	-0.50841	0.514449	15.2203	23.7282								9.73863	5.88674	4
	3.17e-07	-6.49894	-0.126628	0.426168	14.5706	23.0502								9.4801	5.65925	4
	1e-06	-6	2.62521	-2.99841	14.6848	22.5615								9.21827	5.77812	4
	3.17e-06	-5.49894	9.43867	8.14061	16.3871	26.9392								15.2264	4.30353	4
	1e-05	-5	34.2588	41.4851	45.7862	56.832								44.5905	4.72293	4
	3.16e-05	-4.50031	81.6358	77.8957	83.6976	96.09								84.8298	3.94077	4
	0.0001	-4	104.884	106.11	96.7437	109.544								104.32	2.71123	4
	GB1-2
	GB1-Y810A + GB2		20200603	20200605	20200610	20200611								Mean	SEM	N
	rac-BHFF (M)	Log M
Buffer	Buffer		0	0	0	0								0	0	4
EC20 GABA	Buffer	-14	3.362	12.02	15.5176	19.7078								12.6518	3.4725	4
	3.17e-07	-6.49894	1.87016	12.5773	11.8682	19.0351								11.3377	3.5438	4
	1e-06	-6	3.92176	12.4406	15.3607	17.2483								12.2428	2.9447	4
	3.17e-06	-5.49894	5.65016	13.1367	14.0259	19.4398								13.0631	2.83646	4
	1e-05	-5	9.66453	13.2234	15.6449	18.478								14.2527	1.86865	4
	3.16e-05	-4.50031	25.7856	36.1828	18.5485	33.5926								28.5274	3.99332	4
	0.0001	-4	45.8461	49.2926	50.3071	66.0395								52.8713	4.49201	4
	GB1-3
	GB1-N811A + GB2		20200603	20200605	20200610	20200611								Mean	SEM	N
	rac-BHFF (M)	Log M
Buffer	Buffer		0	0	0	0								0	0	4
EC20 GABA	Buffer	-14	4.27046	10.6877	11.3599	21.3895								11.9269	3.53576	4
	3.17e-07	-6.49894	5.12474	10.9754	12.8273	23.8228								13.1876	3.90662	4
	1e-06	-6	11.3038	11.3772	12.3961	21.5682								14.1613	2.48151	4
	3.17e-06	-5.49894	19.5114	14.1164	15.5015	25.0893								18.5547	2.46031	4
	1e-05	-5	45.6262	44.412	54.6328	43.3572								47.007	2.58383	4
	3.16e-05	-4.50031	91.5838	104.517	86.8452	107.557								97.6259	4.99045	4
	0.0001	-4	104.429	124.003	104.528	115.293								112.064	4.72625	4
	GB1-20
	GB1-K792A + GB2		20200603	20200605	20200610	20200611								Mean	SEM	N
	rac-BHFF (M)	Log M
Buffer	Buffer		0	0	0	0								0	0	4
EC20 GABA	Buffer	-14	24.2141	6.43263	4.1327	48.5789								20.8396	10.2776	4
	3.17e-07	-6.49894	19.0591	6.48133	21.4464	49.3378								24.0812	9.03611	4
	1e-06	-6	15.0381	6.90294	21.9622	48.6238								23.1318	9.03739	4
	3.17e-06	-5.49894	22.1477	7.10385	18.8103	49.012								24.2684	8.85605	4
	1e-05	-5	27.9997	7.27431	23.0516	50.2712								27.1492	8.88421	4
	3.16e-05	-4.50031	54.7584	32.672	47.4528	64.176								49.7648	6.64659	4
	0.0001	-4	85.464	80.6932	76.5671	78.8312								80.3889	1.89036	4
	GB2-9
	GB1 + GB2-M694A		20200603	20200605	20200610	20200611								Mean	SEM	N
	rac-BHFF (M)	Log M
Buffer	Buffer		0	0	0	0								0	0	4
EC20 GABA	Buffer	-14	22.3827	31.9267	23.8726	40.3474								29.6323	4.14135	4
	3.17e-07	-6.49894	20	27.9877	26.868	40.0683								28.731	4.17122	4
	1e-06	-6	17.9052	28.9253	28.945	41.9429								29.4296	4.91497	4
	3.17e-06	-5.49894	14.3161	23.6484	27.2686	41.5693								26.7006	5.65752	4
	1e-05	-5	20.2772	25.9923	30.5741	44.4014								30.3113	5.14731	4
	3.16e-05	-4.50031	24.7401	30.8988	44.6723	48.0154								37.0817	5.53553	4
	0.0001	-4	68.7671	64.2482	65.681	79.9063								69.6506	3.54617	4
	GB2-10
	GB1 + GB2-Y697A		20200603	20200605	20200610	20200611								Mean	SEM	N
	rac-BHFF (M)	Log M
Buffer	Buffer		0	0	0	0								0	0	4
EC20 GABA	Buffer	-14	30.8448	5.92072	10.6194	15.5282								15.7283	5.40709	4
	3.17e-07	-6.49894	45.6039	7.60003	11.4147	17.4926								20.5278	8.60327	4
	1e-06	-6	20.9015	7.03485	10.7818	19.3667								14.5212	3.34435	4
	3.17e-06	-5.49894	41.7549	10.0312	12.0309	19.8888								20.9265	7.2614	4
	1e-05	-5	43.8273	23	26.8693	34.9869								32.1709	4.61892	4
	3.16e-05	-4.50031	79.3461	55.3864	54.2676	60.23								62.3075	5.82503	4
	0.0001	-4	111.126	117.54	90.1137	103.86								105.66	5.88739	4
	GB2-11
	GB1 + GB2-N698A		20200603	20200605	20200610	20200611								Mean	SEM	N
	rac-BHFF (M)	Log M
Buffer	Buffer		0	0	0	0								0	0	4
EC20 GABA	Buffer	-14	48.4697	47.5357	25.8233	47.7491								42.3944	5.52734	4
	3.17e-07	-6.49894	46.421	43.8554	22.4764	47.2472								40	5.88566	4
	1e-06	-6	49.9181	46.4129	24.4038	47.1181								41.9632	5.90188	4
	3.17e-06	-5.49894	46.4285	50.665	26.7938	47.5578								42.8613	5.43019	4
	1e-05	-5	46.6553	42.5952	27.036	48.2731								41.1399	4.8506	4
	3.16e-05	-4.50031	46.9124	63.4455	30.3661	65.6448								51.5922	8.218	4
	0.0001	-4	66.9533	84.548	60.3805	85.9977								74.4699	6.38663	4
	GB2-22
	GB1 + GB2-S695A		20200603	20200605	20200610	20200611								Mean	SEM	N
	rac-BHFF (M)	Log M
Buffer	Buffer		0	0	0	0								0	0	4
EC20 GABA	Buffer	-14	-1.21149	2.2899	11.8498	23.612								9.13507	5.55923	4
	3.17e-07	-6.49894	2.94998	3.18486	16.1594	27.325								12.4048	5.85313	4
	1e-06	-6	1.22756	3.98088	15.9438	26.8289								11.9953	5.88643	4
	3.17e-06	-5.49894	4.22573	10.0584	21.9248	28.0613								16.0676	5.4352	4
	1e-05	-5	36.3277	75.8042	61.6313	80.6525								63.6039	9.9473	4
	3.16e-05	-4.50031	64.5729	124.806	124.315	127.568								110.316	15.2643	4
	0.0001	-4	100.178	158.903	145.98	142.247								136.827	12.7268	4

## Sheet: Fig. 4B-C GABA_Raw
WT
GB1 + GB2		20200313	20200526	20200529	20200603	20200605				Mean	SEM	N
GABA (M)	Log M
Buffer	-14	2.0685	5.09033	4.51767	4.252	4.116				4.0089	0.513033	5
1e-10	-10	2.67217	4.70033	4.38483	4.16983	4.01567				3.98857	0.348578	5
1e-09	-9	2.8715	4.49378	5.5705	5.37067	4.56156				4.5736	0.476067	5
1e-08	-8	2.8945	5.49433	7.86833	7.91133	7.75322				6.38434	0.98435	5
1e-07	-7	12.6277	13.8408	19.3573	19.486	22.0107				17.4645	1.80087	5
1e-06	-6	17.485	31.102	29.907	27.3426	31.0836				27.384	2.56776	5
1e-05	-5	19.6589	35.0686	30.3671	30.643	35.4186				30.2312	2.84842	5
0.0001	-4	20.5433	33.9255	31.227	28.746	35.2472				29.9378	2.60221	5
GB1-1
GB1-M807A + GB2		20200313	20200526	20200529	20200603	20200605				Mean	SEM	N
GABA (M)	Log M
Buffer	-14	2.81533	4.45817	6.86367	4.27317	3.77083				4.43623	0.670432	5
1e-10	-10	2.74467	5.678	7.45678	4.55456	3.85217				4.85723	0.806102	5
1e-09	-9	2.79078	6.28717	7.46033	4.40267	3.57467				4.90312	0.864065	5
1e-08	-8	3.071	5.56356	8.1975	9.34456	9.36056				7.10743	1.22364	5
1e-07	-7	12.3179	12.3393	16.4603	20.4124	19.9403				16.2941	1.7569	5
1e-06	-6	19.1489	28.4073	28.2388	27.5162	32.3293				27.1281	2.16496	5
1e-05	-5	20.5923	34.3498	29.7068	32.7458	38.8623				31.2514	3.04763	5
0.0001	-4	22.386	35.7315	30.6252	32.1085	40.8801				32.3463	3.05378	5
GB1-2
GB1-Y810A + GB2		20200313	20200526	20200529	20200603	20200605				Mean	SEM	N
GABA (M)	Log M
Buffer	-14	2.746	4.88667	7.80533	4.542	3.31483				4.65897	0.878387	5
1e-10	-10	2.48433	4.202	7.72317	4.512	3.60533				4.50537	0.875812	5
1e-09	-9	2.52433	4.62483	8.12367	4.48733	3.88589				4.72921	0.926402	5
1e-08	-8	2.80167	5.89711	8.048	4.813	4.73867				5.25969	0.857142	5
1e-07	-7	9.26944	11.8564	14.923	13.8619	15.2151				13.0252	1.10836	5
1e-06	-6	18.549	23.3387	26.2853	21.8567	28.2574				23.6574	1.69568	5
1e-05	-5	23.6207	29.8404	28.8353	31.751	42.382				31.2859	3.08375	5
0.0001	-4	24.174	32.4927	29.5405	33.4868	47.0364				33.3461	3.78671	5
GB1-3
GB1-N811A + GB2		20200313	20200526	20200529	20200603	20200605				Mean	SEM	N
GABA (M)	Log M
Buffer	-14	2.56117	5.8325	6.727	3.876	3.02956				4.40524	0.806252	5
1e-10	-10	2.29133	6.30667	7.24967	4.12367	3.121				4.61847	0.940107	5
1e-09	-9	2.69767	7.34533	6.705	6.60867	3.339				5.33913	0.96125	5
1e-08	-8	2.49317	6.79567	7.40233	3.87667	3.62789				4.83914	0.956426	5
1e-07	-7	10.4906	12.1602	9.48867	17.2685	15.3053				12.9427	1.46373	5
1e-06	-6	19.8407	25.8878	15.6155	27.2348	26.3545				22.9867	2.25873	5
1e-05	-5	24.4885	31.3258	16.838	36.0878	32.727				28.2934	3.43008	5
0.0001	-4	25.078	31.6802	17.1693	35.775	36.4549				29.2315	3.63138	5
GB1-20
GB1-K792A + GB2			20200526	20200529	20200603	20200605				Mean	SEM	N
GABA (M)	Log M
Buffer	-14		9.68333	5.928	4.01633	3.13744				5.69128	1.45259	4
1e-10	-10		9.797	6.476	4.24167	3.52256				6.00931	1.41046	4
1e-09	-9		9.6775	6.611	3.463	4.31122				6.01568	1.38998	4
1e-08	-8		5.973	7.04767	6.64389	8.66622				7.08269	0.572477	4
1e-07	-7		13.147	11.3413	16.271	21.0673				15.4567	2.12942	4
1e-06	-6		23.6128	18.966	21.827	27.3881				22.9485	1.76233	4
1e-05	-5		28.1303	21.8277	25.843	33.389				27.2975	2.41237	4
0.0001	-4		29.93	21.6305	28.2553	37.035				29.2127	3.16372	4
GB2-9
GB1 + GB2-M694A		20200313	20200526	20200529	20200603	20200605				Mean	SEM	N
GABA (M)	Log M
Buffer	-14	2.50817	9.661	5.43467	3.34033	4.24522				5.03788	1.2538	5
1e-10	-10	2.66856	9.62267	5.92267	5.08933	4.44789				5.55022	1.15011	5
1e-09	-9	2.57767	9.62067	4.296	3.01533	5.343				4.97053	1.26028	5
1e-08	-8	2.4905	8.29067	5.967	4.52478	6.032				5.46099	0.956281	5
1e-07	-7	9.25417	9.35167	9.87778	11.0651	14.0767				10.7251	0.897678	5
1e-06	-6	12.8904	19.8313	14.7186	18.7361	24.8377				18.2028	2.08949	5
1e-05	-5	15.8705	23.2515	16.3068	24.1155	30.8416				22.0772	2.7764	5
0.0001	-4	16.6717	24.3967	16.4883	25.7267	33.8551				23.4277	3.23074	5
GB2-10
GB1 + GB2-Y697A		20200313	20200526	20200529	20200603	20200605				Mean	SEM	N
GABA (M)	Log M
Buffer	-14	2.45817	7.33433	5.15267	3.768	3.8815				4.51893	0.822954	5
1e-10	-10	2.862	7.46767	5.055	3.664	4.23667				4.65707	0.788765	5
1e-09	-9	2.962	7.91467	7.963	3.66367	3.798				5.26027	1.10272	5
1e-08	-8	2.64367	7.87767	5.63433	3.93844	4.00933				4.82069	0.899533	5
1e-07	-7	4.20422	7.7085	5.8295	8.94933	10.6818				7.47468	1.13837	5
1e-06	-6	9.222	12.3291	10.2867	14.9966	21.1278				13.5924	2.12578	5
1e-05	-5	15.7637	25.2123	15.9062	22.499	23.9663				20.6695	2.02003	5
0.0001	-4	17.5665	25.2174	16.962	24.3401	27.5652				22.3302	2.13648	5
GB2-11
GB1 + GB2-N698A		20200313	20200526	20200529	20200603	20200605				Mean	SEM	N
GABA (M)	Log M
Buffer	-14	2.661	9.51122	7.16667	4.92367	3.98467				5.64944	1.21335	5
1e-10	-10	2.822	11.7747	4.84367	4.2975	3.773				5.50217	1.60316	5
1e-09	-9	3.16217	9.25433	3.397	3.82667	4.126				4.75323	1.1376	5
1e-08	-8	3.18733	10.252	4.733	4.50133	6.04167				5.74307	1.21477	5
1e-07	-7	8.84244	15.6573	12.7724	17.1155	24.8461				15.8468	2.65656	5
1e-06	-6	17.2943	28.9171	19.5864	25.472	38.0184				25.8577	3.67459	5
1e-05	-5	21.611	30.5472	23.1037	31.6048	43.295				30.0323	3.85721	5
0.0001	-4	23.8068	30.9523	22.3178	32.145	47.1007				31.2645	4.40066	5
GB2-22
GB1 + GB2-S695A			20200526	20200529	20200603	20200605				Mean	SEM	N
GABA (M)	Log M
Buffer	-14		7.6115	4.78267	3.57733	4.20533				5.04421	0.890451	4
1e-10	-10		8.991	4.66317	4.51267	4.583				5.68746	1.10161	4
1e-09	-9		8.39189	4.442	5.06567	4.33622				5.55894	0.957928	4
1e-08	-8		4.89233	6.50822	6.732	10.3333				7.11647	1.14792	4
1e-07	-7		13.553	16.5673	24.283	25.4039				19.9518	2.89948	4
1e-06	-6		25.195	19.294	31.1273	34.3123				27.4822	3.31933	4
1e-05	-5		30.0467	22.173	34.6588	38.6626				31.3852	3.53945	4
0.0001	-4		30.3872	21.8117	34.1731	41.7621				32.0335	4.14749	4

## Sheet: Fig. 4B-C GABA_%
WT
GB1 + GB2		20200313	20200526	20200529	20200603	20200605				Mean	SEM	N
GABA (M)	Log M
Buffer	-14	0	0	0	0	0				0	0	5
1e-10	-10	3.26751	-1.35251	-0.497332	-0.335458	-0.322292				0.151983	0.801691	5
1e-09	-9	4.34645	-2.06885	3.94182	4.56711	1.43122				2.44355	1.2602	5
1e-08	-8	4.47095	1.40107	12.5449	14.9397	11.6835				9.00803	2.5817	5
1e-07	-7	57.1543	30.3466	55.5599	62.1948	57.4814				52.5474	5.65946	5
1e-06	-6	83.446	90.2081	95.0579	94.2703	86.6254				89.9215	2.21555	5
1e-05	-5	95.2127	103.964	96.7806	107.745	100.55				100.85	2.29853	5
0.0001	-4	100	100	100	100	100				100	0	5
GB1-1
GB1-M807A + GB2		20200313	20200526	20200529	20200603	20200605				Mean	SEM	N
GABA (M)	Log M
Buffer	-14	0	0	0	0	0				0	0	5
1e-10	-10	-0.382499	4.23037	2.22061	1.14881	0.261259				1.49571	0.811656	5
1e-09	-9	-0.132912	6.34295	2.23393	0.528701	-0.630128				1.66851	1.26487	5
1e-08	-8	1.38387	3.83348	4.99389	20.7046	17.9554				9.77424	3.96829	5
1e-07	-7	51.4351	27.3318	35.93	65.8907	51.9398				46.5055	6.74201	5
1e-06	-6	88.4098	83.0554	80.0288	94.8929	91.7359				87.6245	2.72873	5
1e-05	-5	96.2228	103.664	85.525	116.243	112.721				102.875	5.57473	5
0.0001	-4	105.931	108.456	88.9633	113.641	119.203				107.239	5.10546	5
GB1-2
GB1-Y810A + GB2		20200313	20200526	20200529	20200603	20200605				Mean	SEM	N
GABA (M)	Log M
Buffer	-14	0	0	0	0	0				0	0	5
1e-10	-10	-1.41634	-2.37442	-0.307632	-0.122479	0.933147				-0.657544	0.568439	5
1e-09	-9	-1.19983	-0.908037	1.19185	-0.223185	1.83435				0.139028	0.591719	5
1e-08	-8	0.301313	3.50421	0.908548	1.10639	4.57365				2.07882	0.828571	5
1e-07	-7	35.3099	24.1711	26.6486	38.0497	38.2262				32.4811	2.95881	5
1e-06	-6	85.538	63.9913	69.1893	70.6894	80.1209				73.9058	3.90399	5
1e-05	-5	112.99	86.5394	78.7365	111.084	125.492				102.968	8.74843	5
0.0001	-4	115.985	95.7373	81.3767	118.171	140.443				110.343	10.1279	5
GB1-3
GB1-N811A + GB2		20200313	20200526	20200529	20200603	20200605				Mean	SEM	N
GABA (M)	Log M
Buffer	-14	0	0	0	0	0				0	0	5
1e-10	-10	-1.46055	1.64441	1.95687	1.01113	0.293738				0.68912	0.608311	5
1e-09	-9	0.738843	5.24649	-0.0823682	11.1565	0.994				3.61069	2.10176	5
1e-08	-8	-0.368068	3.34025	2.52845	0.00272312	1.92197				1.48507	0.719469	5
1e-07	-7	42.9199	21.9445	10.3397	54.6767	39.4324				33.8626	7.87925	5
1e-06	-6	93.5299	69.5516	33.2786	95.3655	74.9246				73.3301	11.2128	5
1e-05	-5	118.688	88.4106	37.8557	131.509	95.3944				94.3715	16.1262	5
0.0001	-4	121.878	89.6396	39.0962	130.232	107.369				97.643	16.1799	5
GB1-20
GB1-K792A + GB2			20200526	20200529	20200603	20200605				Mean	SEM	N
GABA (M)	Log M
Buffer	-14		0	0	0	0				0	0	4
1e-10	-10		0.394196	2.05172	0.919954	1.23706				1.15073	0.346991	4
1e-09	-9		-0.0202288	2.55716	-2.25906	3.77042				1.01207	1.34665	4
1e-08	-8		-12.8674	4.19204	10.7273	17.7596				4.9529	6.55424	4
1e-07	-7		12.012	20.2676	50.0313	57.5946				34.9763	11.1129	4
1e-06	-6		48.3073	48.8144	72.7144	77.8982				61.9336	7.79361	4
1e-05	-5		63.974	59.5285	89.1103	97.1743				77.4468	9.2547	4
0.0001	-4		70.2152	58.7903	98.9589	108.886				84.2126	11.7914	4
GB2-9
GB1 + GB2-M694A		20200313	20200526	20200529	20200603	20200605				Mean	SEM	N
GABA (M)	Log M
Buffer	-14	0	0	0	0	0				0	0	5
1e-10	-10	0.868147	-0.13294	1.82708	7.14052	0.651009				2.07076	1.30538	5
1e-09	-9	0.376184	-0.139874	-4.26318	-1.32686	3.52629				-0.365487	1.2622	5
1e-08	-8	-0.0956274	-4.7523	1.99306	4.83565	5.7395				1.54406	1.88375	5
1e-07	-7	36.5145	-1.07276	16.635	31.5374	31.5807				23.039	6.88898	5
1e-06	-6	56.1969	35.2706	34.759	62.8553	66.1472				51.0458	6.73858	5
1e-05	-5	72.3272	47.1317	40.7053	84.8174	85.433				66.0829	9.40098	5
0.0001	-4	76.6637	51.1031	41.385	91.3952	95.1132				71.132	10.7292	5
GB2-10
GB1 + GB2-Y697A		20200313	20200526	20200529	20200603	20200605				Mean	SEM	N
GABA (M)	Log M
Buffer	-14	0	0	0	0	0				0	0	5
1e-10	-10	2.18586	0.462401	-0.365666	-0.424594	1.14087				0.599774	0.490343	5
1e-09	-9	2.72713	2.01259	10.5219	-0.425953	-0.268219				2.91349	2.00012	5
1e-08	-8	1.00407	1.88428	1.80336	0.695862	0.410627				1.15964	0.29494	5
1e-07	-7	9.451	1.29761	2.53407	21.1535	21.8441				11.256	4.40776	5
1e-06	-6	36.6111	17.3218	19.2217	45.8421	55.3988				34.8791	7.40829	5
1e-05	-5	72.0196	62.0007	40.2612	76.4718	64.5167				63.054	6.25771	5
0.0001	-4	81.7779	62.0184	44.2143	83.9884	76.0769				69.6152	7.41348	5
GB2-11
GB1 + GB2-N698A		20200313	20200526	20200529	20200603	20200605				Mean	SEM	N
GABA (M)	Log M
Buffer	-14	0	0	0	0	0				0	0	5
1e-10	-10	0.871456	7.8496	-8.69733	-2.55641	-0.679917				-0.642522	2.67351	5
1e-09	-9	2.7127	-0.890889	-14.1137	-4.47865	0.453993				-3.2633	2.95268	5
1e-08	-8	2.84892	2.56901	-9.11167	-1.72423	6.60751				0.237907	2.6841	5
1e-07	-7	33.4587	21.3146	20.9881	49.7748	67.0113				38.5095	8.85278	5
1e-06	-6	79.2068	67.2994	46.4998	83.8913	109.324				77.2442	10.2987	5
1e-05	-5	102.572	72.9524	59.6683	108.929	126.273				94.079	12.1646	5
0.0001	-4	114.458	74.3575	56.7261	111.135	138.498				99.0347	14.7319	5
GB2-22
GB1 + GB2-S695A			20200526	20200529	20200603	20200605				Mean	SEM	N
GABA (M)	Log M
Buffer	-14		0	0	0	0				0	0	4
1e-10	-10		4.78409	-0.447409	3.81862	1.21315				2.34211	1.1972	4
1e-09	-9		2.70638	-1.27546	6.07632	0.420443				1.98192	1.59001	4
1e-08	-8		-9.43004	6.4605	12.8793	19.6844				7.39856	6.22537	4
1e-07	-7		20.605	44.1219	84.5336	68.0942				54.3387	13.9741	4
1e-06	-6		60.9794	54.3306	112.477	96.71				81.1241	13.9928	4
1e-05	-5		77.8049	65.1096	126.894	110.684				95.1231	14.2953	4
0.0001	-4		78.9859	63.7567	124.911	120.64				97.0736	15.1863	4

## Sheet: Fig. 4D_Raw
Mock
pRK		20200527	20200528	20200529					Mean	SEM	N
Halo	Surface	67.5	75	52.25					64.9167	6.69318	3
WT
GB1 + GB2		20200527	20200528	20200529					Mean	SEM	N
Halo	Surface	4546	3823.4	2482					3617.13	604.685	3
GB1-1
GB1-M807A + GB2		20200527	20200528	20200529					Mean	SEM	N
Halo	Surface	3503.75	3339.75	2076					2973.17	451.075	3
GB1-2
GB1-Y810A + GB2		20200527	20200528	20200529					Mean	SEM	N
Halo	Surface	4807.5	3584.2	2460.5					3617.4	677.724	3
GB1-3
GB1-N811A + GB2		20200527	20200528	20200529					Mean	SEM	N
Halo	Surface	4790.5	3848	2487.75					3708.75	668.383	3
GB1-4
GB1-MYN-AAA + GB2		20200527	20200528	20200529					Mean	SEM	N
Halo	Surface	3765	3258.4	2210.25					3077.88	457.803	3
GB1-20
GB1-K792A + GB2		20200527	20200528	20200529					Mean	SEM	N
Halo	Surface	3450	3547.83	2105					3034.28	465.496	3
GB2-9
GB1 + GB2-M694A		20200527	20200528	20200529					Mean	SEM	N
Halo	Surface	1811.17	1563.67	855					1409.94	286.523	3
GB2-10
GB1 + GB2-Y697A		20200527	20200528	20200529					Mean	SEM	N
Halo	Surface	2551.25	2341	1315.5					2069.25	381.731	3
GB2-11
GB1 + GB2-N698A		20200527	20200528	20200529					Mean	SEM	N
Halo	Surface	2861.33	2407.75	1166					2145.03	506.723	3
GB2-12
GB1 + GB2-MYN-AAA		20200527	20200528	20200529					Mean	SEM	N
Halo	Surface	2132.33	2243.5	1154					1843.28	346.13	3
GB2-22
GB1 + GB2-S695A		20200527	20200528	20200529					Mean	SEM	N
Halo	Surface	4528	4023.5	2185					3578.83	711.971	3

## Sheet: Fig. 4D_%
Mock
pRK		20200527	20200528	20200529					Mean	SEM	N
Halo	Surface	0	0	0					0	0	3
WT
GB1 + GB2		20200527	20200528	20200529					Mean	SEM	N
Halo	Surface	100	100	100					100	0	3
GB1-1
GB1-M807A + GB2		20200527	20200528	20200529					Mean	SEM	N
Halo	Surface	76.7277	87.0972	83.2905					82.3718	3.02844	3
GB1-2
GB1-Y810A + GB2		20200527	20200528	20200529					Mean	SEM	N
Halo	Surface	105.839	93.6186	99.1151					99.5243	3.53365	3
GB1-3
GB1-N811A + GB2		20200527	20200528	20200529					Mean	SEM	N
Halo	Surface	105.459	100.656	100.237					102.117	1.67537	3
GB1-4
GB1-MYN-AAA + GB2		20200527	20200528	20200529					Mean	SEM	N
Halo	Surface	82.5611	84.9269	88.8157					85.4346	1.8233	3
GB1-20
GB1-K792A + GB2		20200527	20200528	20200529					Mean	SEM	N
Halo	Surface	75.5275	92.6484	84.484					84.22	4.94414	3
GB2-9
GB1 + GB2-M694A		20200527	20200528	20200529					Mean	SEM	N
Halo	Surface	38.9342	39.7147	33.0384					37.2291	2.10744	3
GB2-10
GB1 + GB2-Y697A		20200527	20200528	20200529					Mean	SEM	N
Halo	Surface	55.4594	60.4525	51.9909					55.9676	2.45581	3
GB2-11
GB1 + GB2-N698A		20200527	20200528	20200529					Mean	SEM	N
Halo	Surface	62.3832	62.2332	45.838					56.8182	5.49023	3
GB2-12
GB1 + GB2-MYN-AAA		20200527	20200528	20200529					Mean	SEM	N
Halo	Surface	46.1055	57.8513	45.3442					49.767	4.04815	3
GB2-22
GB1 + GB2-S695A		20200527	20200528	20200529					Mean	SEM	N
Halo	Surface	99.5981	105.338	87.7765					97.571	5.16997	3

## Sheet: Fig. 4E-F_Raw
Buffer
		20200527	20200527	20200528	20200528	20200529	20200529	20200604	20200604	20200605	20200605	20200610	20200610					Mean	SEM	N
Mock	pRK	167.555	51.3396	106.997	74.8009	54.9064	144.337	128.292	158.182	148.816	36.9342	128.855	96.0893					108.092	12.9751	12
WT	GB1 + GB2	897.625	555.499	427.084	360.773	290.431	590.197	541.604	726.868	520.384	375.073	429.006	479.105					516.137	48.4233	12
GB1-1	GB1-M807A + GB2							511.752	609.959	419.691	329.805	330.771	362.853					427.472	46.0184	6
GB1-2	GB1-Y810A + GB2							203.754	324.54	216.446	145.704	245.146	326.623					243.702	29.0718	6
GB1-3	GB1-N811A + GB2							306.072	378.696	229.437	166.257	209.87	276.843					261.195	30.9415	6
GB1-4	GB1-MYN-AAA + GB2							129.458	164.306	150.504	61.7887	143.893	104.892					125.807	15.2407	6
GB1-20	GB1-K792A + GB2							665.102	651.511	641.382	465.072	467.08	462.017					558.694	42.1424	6
GB2-9	GB1 + GB2-M694A	1002.84	537.299	422.71	359.267	241.102	460.817											504.005	107.778	6
GB2-10	GB1 + GB2-Y697A	846.006	566.092	404.17	355.919	213.15	367.942											458.88	90.1124	6
GB2-11	GB1 + GB2-N698A	967.667	539.626	376.112	266.751	290.17	319.08											459.901	109.11	6
GB2-12	GB1 + GB2-MYN-AAA	917.112	818.436	476.686	473.571	324.377	507.424											586.268	93.6077	6
GB2-22	GB1 + GB2-S695A	1055.07	650.89	471.808	448.338	445.57	376.568											574.708	103.126	6
GABA 100 μM
		20200527	20200527	20200528	20200528	20200529	20200529	20200604	20200604	20200605	20200605	20200610	20200610					Mean	SEM	N
Mock	pRK	213.155		116.931		65.4891		144.851		161.331		140.665						140.404	19.928	6
WT	GB1 + GB2	1601.2		946.368		778.407		1237.45		1062.29		968.782						1099.08	117.723	6
GB1-1	GB1-M807A + GB2							1362.48		1099.75		949.437						1137.22	120.699	3
GB1-2	GB1-Y810A + GB2							1659.6		1198.45		1164.69						1340.92	159.641	3
GB1-3	GB1-N811A + GB2							1712.97		1424.17		1279						1472.05	127.543	3
GB1-4	GB1-MYN-AAA + GB2							1141.71		1000.52		979.383						1040.54	50.9527	3
GB1-20	GB1-K792A + GB2							1456.16		1102.92		1127.8						1228.96	113.826	3
GB2-9	GB1 + GB2-M694A	1534.74		963.314		744.734												1080.93	235.514	3
GB2-10	GB1 + GB2-Y697A	1605.49		860.208		736.65												1067.45	271.374	3
GB2-11	GB1 + GB2-N698A	1881.89		1074.96		879.858												1278.9	306.71	3
GB2-12	GB1 + GB2-MYN-AAA	1057.09		646.633		636.539												780.089	138.534	3
GB2-22	GB1 + GB2-S695A	1588.44		1160.83		905.67												1218.32	199.185	3
CGP54626 10 μM (without pre-incubation)
		20200527	20200527	20200528	20200528	20200529	20200529	20200604	20200604	20200605	20200605	20200610	20200610					Mean	SEM	N
Mock	pRK	167.955		209.076		61.8176		257.226		156.244		184.875						172.866	26.5858	6
WT	GB1 + GB2	324.997		236.941		138.476		277.188		238.017		240.626						242.708	25.0893	6
GB1-1	GB1-M807A + GB2							306.972		201.133		257.982						255.362	30.5811	3
GB1-2	GB1-Y810A + GB2							276.087		180.723		182.444						213.085	31.5053	3
GB1-3	GB1-N811A + GB2							273.339		211.429		172.298						219.022	29.4142	3
GB1-4	GB1-MYN-AAA + GB2							258.905		150.596		127.192						178.898	40.5702	3
GB1-20	GB1-K792A + GB2							352.884		343.416		258.416						318.238	30.0358	3
GB2-9	GB1 + GB2-M694A	270.381		301.044		86.6071												219.344	66.9562	3
GB2-10	GB1 + GB2-Y697A	481.685		253.077		130.832												288.531	102.822	3
GB2-11	GB1 + GB2-N698A	243.629		276.515		88.6882												202.944	57.9113	3
GB2-12	GB1 + GB2-MYN-AAA	780.195		476.332		289.162												515.23	143.077	3
GB2-22	GB1 + GB2-S695A	258.709		276.174		174.031												236.305	31.5425	3
CGP54626 10 μM (with 24h pre-incubation)
		20200527	20200527	20200528	20200528	20200529	20200529	20200604	20200604	20200605	20200605	20200610	20200610					Mean	SEM	N
Mock	pRK	181.007		180.273		55.6916		283.893		156.799		183.299						173.494	29.7448	6
WT	GB1 + GB2	307.686		325.137		151.165		365.422		275.642		250.69						279.29	30.3174	6
GB1-1	GB1-M807A + GB2							287.604		208.927		172.015						222.849	34.0861	3
GB1-2	GB1-Y810A + GB2							335.196		200.136		273.644						269.659	39.0393	3
GB1-3	GB1-N811A + GB2							279.585		160.165		147.717						195.822	42.0353	3
GB1-4	GB1-MYN-AAA + GB2							283.607		170.116		209.833						221.186	33.2501	3
GB1-20	GB1-K792A + GB2							333.875		257.136		217.327						269.446	34.203	3
GB2-9	GB1 + GB2-M694A	217.292		246.132		63.3503												175.591	56.7347	3
GB2-10	GB1 + GB2-Y697A	503.357		451.144		236.643												397.048	81.6066	3
GB2-11	GB1 + GB2-N698A	194.649		300.11		57.8855												184.215	70.1186	3
GB2-12	GB1 + GB2-MYN-AAA	902.156		652.722		382.914												645.931	149.931	3
GB2-22	GB1 + GB2-S695A	183.446		306.321		132.909												207.559	51.4913	3
GS39783 30 μM
		20200527	20200527	20200528	20200528	20200529	20200529	20200604	20200604	20200605	20200605	20200610	20200610					Mean	SEM	N
Mock	pRK		126.597		216.649		127.734		326.011		47.6355		143.697					164.721	39.0229	6
WT	GB1 + GB2		1183.34		755.151		933.602		1439.63		744.504		953.082					1001.55	109.348	6
GB1-1	GB1-M807A + GB2								1319.29		542.467		726.035					862.598	234.416	3
GB1-2	GB1-Y810A + GB2								432.485		184.203		344.641					320.443	72.687	3
GB1-3	GB1-N811A + GB2								721.787		306.131		461.46					496.459	121.259	3
GB1-4	GB1-MYN-AAA + GB2								266.153		64.5843		148.392					159.71	58.4623	3
GB1-20	GB1-K792A + GB2								1325.37		853.38		1146.21					1108.32	137.562	3
GB2-9	GB1 + GB2-M694A		976.99		801.633		757.124											845.249	67.1117	3
GB2-10	GB1 + GB2-Y697A		573.836		405.408		303.518											427.588	78.8181	3
GB2-11	GB1 + GB2-N698A		596.574		366.076		324.566											429.072	84.6039	3
GB2-12	GB1 + GB2-MYN-AAA		863.009		503.211		442.477											602.899	131.231	3
GB2-22	GB1 + GB2-S695A		1279.11		862.657		833.623											991.797	143.901	3
CGP7930 30 μM
		20200527	20200527	20200528	20200528	20200529	20200529	20200604	20200604	20200605	20200605	20200610	20200610					Mean	SEM	N
Mock	pRK		143.471		194.869		168.859		521.583		68.9472		162.359					210.015	64.7038	6
WT	GB1 + GB2		1026.83		745.111		730.199		1555.55		824.979		922.694					967.56	126.149	6
GB1-1	GB1-M807A + GB2								1457.49		707.323		764.117					976.308	241.146	3
GB1-2	GB1-Y810A + GB2								1672.06		818.819		869.182					1120.02	276.402	3
GB1-3	GB1-N811A + GB2								1208.9		456.699		577.837					747.811	233.18	3
GB1-4	GB1-MYN-AAA + GB2								686.829		506.555		533.812					575.732	56.1032	3
GB1-20	GB1-K792A + GB2								1179.38		833.588		931.966					981.646	102.867	3
GB2-9	GB1 + GB2-M694A		646.685		504.339		492.305											547.776	49.576	3
GB2-10	GB1 + GB2-Y697A		645.84		460.834		403.587											503.42	73.1024	3
GB2-11	GB1 + GB2-N698A		623.098		486.971		382.703											497.591	69.5991	3
GB2-12	GB1 + GB2-MYN-AAA		869.857		500.669		496.148											622.225	123.823	3
GB2-22	GB1 + GB2-S695A		1058.68		775.934		518.526											784.38	155.986	3
rac-BHFF 30 μM
		20200527	20200527	20200528	20200528	20200529	20200529	20200604	20200604	20200605	20200605	20200610	20200610					Mean	SEM	N
Mock	pRK		90.0392		136.635		173.65		335.118		38.9149		116.358					148.452	41.657	6
WT	GB1 + GB2		1405.97		1034.4		1023.35		1654.23		929.215		1109.81					1192.83	113.801	6
GB1-1	GB1-M807A + GB2								1655.64		921.29		1076.19					1217.71	223.487	3
GB1-2	GB1-Y810A + GB2								790.64		477.287		459.808					575.912	107.483	3
GB1-3	GB1-N811A + GB2								1915.51		1084		1254.55					1418.02	253.571	3
GB1-4	GB1-MYN-AAA + GB2								139.273		154.834		145.724					146.61	4.51398	3
GB1-20	GB1-K792A + GB2								844.401		747.07		836.803					809.424	31.2543	3
GB2-9	GB1 + GB2-M694A		966.636		869.931		812.77											883.112	44.9034	3
GB2-10	GB1 + GB2-Y697A		1185.03		833.337		850.669											956.344	114.45	3
GB2-11	GB1 + GB2-N698A		1031.98		1028.14		886.588											982.236	47.8371	3
GB2-12	GB1 + GB2-MYN-AAA		769.93		496.252		432.813											566.332	103.433	3
GB2-22	GB1 + GB2-S695A		1572.37		941.073		834.351											1115.93	230.29	3

## Sheet: Fig. 4E-F_RawA1
Buffer
		20200527	20200527	20200528	20200528	20200529	20200529	20200604	20200604	20200605	20200605	20200610	20200610					Mean	SEM	N
Mock	pRK	0	0	0	0	0	0	0	0	0	0	0	0					0	0	12		CA
WT	GB1 + GB2	730.07	504.159	320.087	285.972	235.525	445.86	413.311	568.686	371.568	338.139	300.151	383.016					408.045	39.9894	12
GB1-1	GB1-M807A + GB2							383.46	451.778	270.875	292.871	201.916	266.764					311.277	36.9067	6
GB1-2	GB1-Y810A + GB2							75.4622	166.358	67.6306	108.77	116.291	230.534					127.508	25.0963	6
GB1-3	GB1-N811A + GB2							177.779	220.514	80.6207	129.322	81.0148	180.753					145.001	23.4803	6
GB1-4	GB1-MYN-AAA + GB2							1.16555	6.12489	1.68834	24.8546	15.038	8.80283					9.61236	3.69106	6
GB1-20	GB1-K792A + GB2							536.81	493.329	492.567	428.138	338.225	365.928					442.499	32.1078	6
GB2-9	GB1 + GB2-M694A	835.282	485.959	315.713	284.466	186.195	316.48											404.016	94.8513	6
GB2-10	GB1 + GB2-Y697A	678.45	514.752	297.172	281.118	158.244	223.605											358.89	80.5875	6
GB2-11	GB1 + GB2-N698A	800.112	488.286	269.114	191.95	235.263	174.743											359.911	99.421	6
GB2-12	GB1 + GB2-MYN-AAA	749.557	767.096	369.689	398.77	269.471	363.087											486.278	87.8649	6
GB2-22	GB1 + GB2-S695A	887.519	599.55	364.81	373.537	390.663	232.231											474.718	95.5981	6
GABA 100 μM
		20200527	20200527	20200528	20200528	20200529	20200529	20200604	20200604	20200605	20200605	20200610	20200610					Mean	SEM	N
Mock	pRK	0		0		0		0		0		0						0	0	6
WT	GB1 + GB2	1388.05		829.437		712.918		1092.6		900.961		828.117						958.68	99.9622	6
GB1-1	GB1-M807A + GB2							1217.63		938.415		808.772						988.273	120.632	3
GB1-2	GB1-Y810A + GB2							1514.75		1037.12		1024.03						1191.97	161.437	3
GB1-3	GB1-N811A + GB2							1568.12		1262.84		1138.34						1323.1	127.674	3
GB1-4	GB1-MYN-AAA + GB2							996.857		839.184		838.718						891.586	52.6356	3
GB1-20	GB1-K792A + GB2							1311.31		941.589		987.137						1080.01	116.394	3
GB2-9	GB1 + GB2-M694A	1321.58		846.383		679.245												949.07	192.404	3
GB2-10	GB1 + GB2-Y697A	1392.33		743.277		671.161												935.59	229.319	3
GB2-11	GB1 + GB2-N698A	1668.74		958.03		814.369												1147.05	264.122	3
GB2-12	GB1 + GB2-MYN-AAA	843.94		529.703		571.049												648.231	98.5798	3
GB2-22	GB1 + GB2-S695A	1375.29		1043.9		840.181												1086.46	155.931	3
CGP54626 10 μM (without pre-incubation)
		20200527	20200527	20200528	20200528	20200529	20200529	20200604	20200604	20200605	20200605	20200610	20200610					Mean	SEM	N
Mock	pRK	0		0		0		0		0		0						0	0	6
WT	GB1 + GB2	157.042		27.8644		76.6585		19.9625		81.7738		55.7512						69.842	20.2	6
GB1-1	GB1-M807A + GB2							49.7463		44.8898		73.1073						55.9145	8.70997	3
GB1-2	GB1-Y810A + GB2							18.8615		24.4791		-2.43108						13.6365	8.19583	3
GB1-3	GB1-N811A + GB2							16.1136		55.1859		-12.5768						19.5742	19.6378	3
GB1-4	GB1-MYN-AAA + GB2							1.67924		-5.64728		-57.6831						-20.5504	18.6864	3
GB1-20	GB1-K792A + GB2							95.658		187.172		73.5414						118.79	34.7818	3
GB2-9	GB1 + GB2-M694A	102.426		91.9676		24.7895												73.0611	24.3239	3
GB2-10	GB1 + GB2-Y697A	313.73		44.0003		69.0145												142.248	86.0445	3
GB2-11	GB1 + GB2-N698A	75.6733		67.439		26.8706												56.6609	15.0837	3
GB2-12	GB1 + GB2-MYN-AAA	612.24		267.255		227.345												368.947	122.191	3
GB2-22	GB1 + GB2-S695A	90.7539		67.0976		112.213												90.0215	13.0288	3
CGP54626 10 μM (with 24h pre-incubation)
		20200527	20200527	20200528	20200528	20200529	20200529	20200604	20200604	20200605	20200605	20200610	20200610					Mean	SEM	N
Mock	pRK	0		0		0		0		0		0						0	0	6
WT	GB1 + GB2	126.679		144.864		95.4732		81.5298		118.843		67.3905						105.797	11.9764	6
GB1-1	GB1-M807A + GB2							3.71189		52.128		-11.2843						14.8519	19.1342	3
GB1-2	GB1-Y810A + GB2							51.3034		43.3371		90.3444						61.6617	14.5246	3
GB1-3	GB1-N811A + GB2							-4.30737		3.36575		-35.5825						-12.1747	11.9117	3
GB1-4	GB1-MYN-AAA + GB2							-0.285251		13.3174		26.5332						13.1885	7.7421	3
GB1-20	GB1-K792A + GB2							49.9826		100.337		34.0274						61.449	19.9821	3
GB2-9	GB1 + GB2-M694A	36.2854		65.8589		7.65868												36.601	16.8017	3
GB2-10	GB1 + GB2-Y697A	322.35		270.871		180.951												258.057	41.3181	3
GB2-11	GB1 + GB2-N698A	13.6419		119.837		2.19385												45.2243	37.4526	3
GB2-12	GB1 + GB2-MYN-AAA	721.149		472.449		327.223												506.94	115.017	3
GB2-22	GB1 + GB2-S695A	2.43891		126.048		77.2173												68.5682	35.9441	3
GS39783 30 μM
		20200527	20200527	20200528	20200528	20200529	20200529	20200604	20200604	20200605	20200605	20200610	20200610					Mean	SEM	N
Mock	pRK		0		0		0		0		0		0					0	0	6
WT	GB1 + GB2		1056.74		538.502		805.868		1113.62		696.868		809.385					836.83	88.5572	6
GB1-1	GB1-M807A + GB2								993.282		494.831		582.337					690.15	153.657	3
GB1-2	GB1-Y810A + GB2								106.474		136.567		200.944					147.995	27.8632	3
GB1-3	GB1-N811A + GB2								395.775		258.495		317.763					324.011	39.7524	3
GB1-4	GB1-MYN-AAA + GB2								-59.8588		16.9488		4.69482					-12.7384	23.8243	3
GB1-20	GB1-K792A + GB2								999.359		805.745		1002.51					935.871	65.0695	3
GB2-9	GB1 + GB2-M694A		850.393		584.984		629.391											688.256	82.0757	3
GB2-10	GB1 + GB2-Y697A		447.239		188.759		175.785											270.594	88.4018	3
GB2-11	GB1 + GB2-N698A		469.977		149.427		196.833											272.079	99.8909	3
GB2-12	GB1 + GB2-MYN-AAA		736.412		286.562		314.743											445.906	145.481	3
GB2-22	GB1 + GB2-S695A		1152.51		646.008		705.89											834.804	159.792	3
CGP7930 30 μM
		20200527	20200527	20200528	20200528	20200529	20200529	20200604	20200604	20200605	20200605	20200610	20200610					Mean	SEM	N
Mock	pRK		0		0		0		0		0		0					0	0	6
WT	GB1 + GB2		883.359		550.243		561.34		1033.96		756.031		760.335					757.545	76.0959	6
GB1-1	GB1-M807A + GB2								935.902		638.376		601.758					725.345	105.808	3
GB1-2	GB1-Y810A + GB2								1150.48		749.872		706.823					869.057	141.257	3
GB1-3	GB1-N811A + GB2								687.314		387.752		415.478					496.848	95.5687	3
GB1-4	GB1-MYN-AAA + GB2								165.246		437.607		371.453					324.769	82.0157	3
GB1-20	GB1-K792A + GB2								657.8		764.64		769.607					730.683	36.4695	3
GB2-9	GB1 + GB2-M694A		503.214		309.47		323.446											378.71	62.3825	3
GB2-10	GB1 + GB2-Y697A		502.369		265.965		234.728											334.354	84.4902	3
GB2-11	GB1 + GB2-N698A		479.627		292.103		213.844											328.524	78.8568	3
GB2-12	GB1 + GB2-MYN-AAA		726.386		305.8		327.289											453.159	136.755	3
GB2-22	GB1 + GB2-S695A		915.208		581.065		349.667											615.313	164.153	3
rac-BHFF 30 μM
		20200527	20200527	20200528	20200528	20200529	20200529	20200604	20200604	20200605	20200605	20200610	20200610					Mean	SEM	N
Mock	pRK		0		0		0		0		0		0					0	0	6
WT	GB1 + GB2		1315.93		897.769		849.704		1319.11		890.301		993.457					1044.38	88.495	6
GB1-1	GB1-M807A + GB2								1320.53		882.375		959.832					1054.24	135.005	3
GB1-2	GB1-Y810A + GB2								455.522		438.372		343.451					412.448	34.8522	3
GB1-3	GB1-N811A + GB2								1580.39		1045.09		1138.19					1254.56	165.121	3
GB1-4	GB1-MYN-AAA + GB2								-195.845		115.919		29.3661					-16.8532	92.9183	3
GB1-20	GB1-K792A + GB2								509.282		708.155		720.445					645.961	68.4312	3
GB2-9	GB1 + GB2-M694A		876.596		733.296		639.12											749.671	69.0407	3
GB2-10	GB1 + GB2-Y697A		1094.99		696.703		677.02											822.903	136.16	3
GB2-11	GB1 + GB2-N698A		941.943		891.503		712.938											848.795	69.4716	3
GB2-12	GB1 + GB2-MYN-AAA		679.89		359.617		259.163											432.89	126.859	3
GB2-22	GB1 + GB2-S695A		1482.33		804.439		660.701											982.491	253.342	3

## Sheet: Fig. 4E-F_RawA2
Buffer
		20200527	20200527	20200528	20200528	20200529	20200529	20200604	20200604	20200605	20200605	20200610	20200610					Mean	SEM	N
Mock	pRK	0	0	0	0	0	0	0	0	0	0	0	0					0	0	12
WT	GB1 + GB2	0	0	0	0	0	0	0	0	0	0	0	0					0	0	12
GB1-1	GB1-M807A + GB2							0	0	0	0	0	0					0	0	6
GB1-2	GB1-Y810A + GB2							0	0	0	0	0	0					0	0	6
GB1-3	GB1-N811A + GB2							0	0	0	0	0	0					0	0	6
GB1-4	GB1-MYN-AAA + GB2							0	0	0	0	0	0					0	0	6
GB1-20	GB1-K792A + GB2							0	0	0	0	0	0					0	0	6
GB2-9	GB1 + GB2-M694A	0	0	0	0	0	0											0	0	6
GB2-10	GB1 + GB2-Y697A	0	0	0	0	0	0											0	0	6
GB2-11	GB1 + GB2-N698A	0	0	0	0	0	0											0	0	6
GB2-12	GB1 + GB2-MYN-AAA	0	0	0	0	0	0											0	0	6
GB2-22	GB1 + GB2-S695A	0	0	0	0	0	0											0	0	6
GABA 100 μM
		20200527		20200528		20200529		20200604		20200605		20200610						Mean	SEM	N
Mock	pRK	0		0		0		0		0		0						0	0	6
WT	GB1 + GB2	657.98		509.351		477.393		679.286		529.393		527.966						563.561	34.2078	6
GB1-1	GB1-M807A + GB2							834.172		667.54		606.856						702.856	67.9549	3
GB1-2	GB1-Y810A + GB2							1439.29		969.489		907.738						1105.51	167.842	3
GB1-3	GB1-N811A + GB2							1390.34		1182.22		1057.32						1209.96	97.1304	3
GB1-4	GB1-MYN-AAA + GB2							995.692		837.496		823.68						885.622	55.1789	3
GB1-20	GB1-K792A + GB2							774.5		449.022		648.912						624.145	94.7698	3
GB2-9	GB1 + GB2-M694A	486.3		530.67		493.05												503.34	13.8033	3
GB2-10	GB1 + GB2-Y697A	713.883		446.105		512.917												557.635	80.4698	3
GB2-11	GB1 + GB2-N698A	868.625		688.916		579.106												712.216	84.385	3
GB2-12	GB1 + GB2-MYN-AAA	94.3824		160.014		301.579												185.325	61.1367	3
GB2-22	GB1 + GB2-S695A	487.771		679.092		449.517												538.793	71.013	3
CGP54626 10 μM (without pre-incubation)
																		Mean	SEM	N
Mock	pRK																	#DIV/0!	#DIV/0!	0
WT	GB1 + GB2																	#DIV/0!	#DIV/0!	0
GB1-1	GB1-M807A + GB2																	#DIV/0!	#DIV/0!	0
GB1-2	GB1-Y810A + GB2																	#DIV/0!	#DIV/0!	0
GB1-3	GB1-N811A + GB2																	#DIV/0!	#DIV/0!	0
GB1-4	GB1-MYN-AAA + GB2																	#DIV/0!	#DIV/0!	0
GB1-20	GB1-K792A + GB2																	#DIV/0!	#DIV/0!	0
GB2-9	GB1 + GB2-M694A																	#DIV/0!	#DIV/0!	0
GB2-10	GB1 + GB2-Y697A																	#DIV/0!	#DIV/0!	0
GB2-11	GB1 + GB2-N698A																	#DIV/0!	#DIV/0!	0
GB2-12	GB1 + GB2-MYN-AAA																	#DIV/0!	#DIV/0!	0
GB2-22	GB1 + GB2-S695A																	#DIV/0!	#DIV/0!	0
CGP54626 10 μM (with 24h pre-incubation)
																		Mean	SEM	N
Mock	pRK																	#DIV/0!	#DIV/0!	0
WT	GB1 + GB2																	#DIV/0!	#DIV/0!	0
GB1-1	GB1-M807A + GB2																	#DIV/0!	#DIV/0!	0
GB1-2	GB1-Y810A + GB2																	#DIV/0!	#DIV/0!	0
GB1-3	GB1-N811A + GB2																	#DIV/0!	#DIV/0!	0
GB1-4	GB1-MYN-AAA + GB2																	#DIV/0!	#DIV/0!	0
GB1-20	GB1-K792A + GB2																	#DIV/0!	#DIV/0!	0
GB2-9	GB1 + GB2-M694A																	#DIV/0!	#DIV/0!	0
GB2-10	GB1 + GB2-Y697A																	#DIV/0!	#DIV/0!	0
GB2-11	GB1 + GB2-N698A																	#DIV/0!	#DIV/0!	0
GB2-12	GB1 + GB2-MYN-AAA																	#DIV/0!	#DIV/0!	0
GB2-22	GB1 + GB2-S695A																	#DIV/0!	#DIV/0!	0
GS39783 30 μM
			20200527		20200528		20200529		20200604		20200605		20200610					Mean	SEM	N
Mock	pRK		0		0		0		0		0		0					0	0	6
WT	GB1 + GB2		552.58		252.529		360.008		544.93		358.73		426.369					415.858	47.7919	6
GB1-1	GB1-M807A + GB2								541.505		201.96		315.573					353.013	99.7896	3
GB1-2	GB1-Y810A + GB2								-59.8846		27.7977		-29.5905					-20.5592	25.7113	3
GB1-3	GB1-N811A + GB2								175.261		129.173		137.009					147.148	14.2376	3
GB1-4	GB1-MYN-AAA + GB2								-65.9837		-7.90578		-4.10801					-25.9992	20.0223	3
GB1-20	GB1-K792A + GB2								506.03		377.607		636.582					506.74	74.7605	3
GB2-9	GB1 + GB2-M694A		364.433		300.518		312.911											325.954	19.5695	3
GB2-10	GB1 + GB2-Y697A		-67.5133		-92.3587		-47.82											-69.2307	12.8858	3
GB2-11	GB1 + GB2-N698A		-18.309		-42.5235		22.0897											-12.9143	18.8463	3
GB2-12	GB1 + GB2-MYN-AAA		-30.6845		-112.208		-48.3435											-63.7453	24.7617	3
GB2-22	GB1 + GB2-S695A		552.963		272.471		473.659											433.031	83.4803	3
CGP7930 30 μM
			20200527		20200528		20200529		20200604		20200605		20200610					Mean	SEM	N
Mock	pRK		0		0		0		0		0		0					0	0	6
WT	GB1 + GB2		379.2		264.27		115.48		465.278		417.893		377.319					336.573	51.8861	6
GB1-1	GB1-M807A + GB2								484.124		345.505		334.994					388.208	48.0542	3
GB1-2	GB1-Y810A + GB2								984.117		641.102		476.288					700.503	149.576	3
GB1-3	GB1-N811A + GB2								466.8		258.429		234.725					319.985	73.7258	3
GB1-4	GB1-MYN-AAA + GB2								159.121		412.753		362.65					311.508	77.554	3
GB1-20	GB1-K792A + GB2								164.471		336.502		403.679					301.551	71.2306	3
GB2-9	GB1 + GB2-M694A		17.2545		25.0036		6.96634											16.4081	5.22407	3
GB2-10	GB1 + GB2-Y697A		-12.3829		-15.1522		11.1229											-5.47074	8.33522	3
GB2-11	GB1 + GB2-N698A		-8.65877		100.152		39.1003											43.5313	31.4891	3
GB2-12	GB1 + GB2-MYN-AAA		-40.7101		-92.9701		-35.7971											-56.4924	18.2939	3
GB2-22	GB1 + GB2-S695A		315.658		207.528		117.436											213.541	57.3006	3
rac-BHFF 30 μM
			20200527		20200528		20200529		20200604		20200605		20200610					Mean	SEM	N
Mock	pRK		0		0		0		0		0		0					0	0	6
WT	GB1 + GB2		811.769		611.797		403.844		750.422		552.162		610.441					623.406	59.217	6
GB1-1	GB1-M807A + GB2								868.748		589.504		693.068					717.107	81.5018	3
GB1-2	GB1-Y810A + GB2								289.163		329.602		112.916					243.894	66.5211	3
GB1-3	GB1-N811A + GB2								1359.88		915.764		957.437					1077.69	141.605	3
GB1-4	GB1-MYN-AAA + GB2								-201.97		91.0648		20.5633					-30.114	88.3053	3
GB1-20	GB1-K792A + GB2								15.9533		280.017		354.517					216.829	102.715	3
GB2-9	GB1 + GB2-M694A		390.637		448.829		322.64											387.369	36.4643	3
GB2-10	GB1 + GB2-Y697A		580.234		415.585		453.415											483.078	49.7903	3
GB2-11	GB1 + GB2-N698A		453.657		699.553		538.194											563.802	72.1296	3
GB2-12	GB1 + GB2-MYN-AAA		-87.2058		-39.1528		-103.924											-76.7607	19.4134	3
GB2-22	GB1 + GB2-S695A		882.783		430.902		428.47											580.718	151.034	3

## Sheet: Fig. 4E&4S1A_%
Buffer
		20200527	20200527	20200528	20200528	20200529	20200529	20200604	20200604	20200605	20200605	20200610	20200610					Mean	SEM	N
Mock	pRK																	#DIV/0!	#DIV/0!	0
WT	GB1 + GB2																	#DIV/0!	#DIV/0!	0
GB1-1	GB1-M807A + GB2																	#DIV/0!	#DIV/0!	0
GB1-2	GB1-Y810A + GB2																	#DIV/0!	#DIV/0!	0
GB1-3	GB1-N811A + GB2																	#DIV/0!	#DIV/0!	0
GB1-4	GB1-MYN-AAA + GB2																	#DIV/0!	#DIV/0!	0
GB1-20	GB1-K792A + GB2																	#DIV/0!	#DIV/0!	0
GB2-9	GB1 + GB2-M694A																	#DIV/0!	#DIV/0!	0
GB2-10	GB1 + GB2-Y697A																	#DIV/0!	#DIV/0!	0
GB2-11	GB1 + GB2-N698A																	#DIV/0!	#DIV/0!	0
GB2-12	GB1 + GB2-MYN-AAA																	#DIV/0!	#DIV/0!	0
GB2-22	GB1 + GB2-S695A																	#DIV/0!	#DIV/0!	0
GABA 100 μM
		20200527		20200528		20200529		20200604		20200605		20200610						Mean	SEM	N
Mock	pRK	0		0		0		0		0		0						0	0	6
WT	GB1 + GB2	100		100		100		100		100		100						100	2.59454e-15	6
GB1-1	GB1-M807A + GB2							122.801		126.095		114.942						121.28	3.30834	3
GB1-2	GB1-Y810A + GB2							211.883		183.132		171.931						188.982	11.8982	3
GB1-3	GB1-N811A + GB2							204.677		223.317		200.264						209.419	7.06462	3
GB1-4	GB1-MYN-AAA + GB2							146.579		158.199		156.01						153.596	3.56497	3
GB1-20	GB1-K792A + GB2							114.017		84.8184		122.908						107.248	11.5046	3
GB2-9	GB1 + GB2-M694A	73.9079		104.186		103.28												93.7911	9.945	3
GB2-10	GB1 + GB2-Y697A	108.496		87.583		107.441												101.173	6.80203	3
GB2-11	GB1 + GB2-N698A	132.014		135.254		121.306												129.524	4.21443	3
GB2-12	GB1 + GB2-MYN-AAA	14.3443		31.4152		63.172												36.3105	14.3063	3
GB2-22	GB1 + GB2-S695A	74.1316		133.325		94.1608												100.539	17.3827	3
CGP54626 10 μM (without pre-incubation)
																		Mean	SEM	N
Mock	pRK																	#DIV/0!	#DIV/0!	0
WT	GB1 + GB2																	#DIV/0!	#DIV/0!	0
GB1-1	GB1-M807A + GB2																	#DIV/0!	#DIV/0!	0
GB1-2	GB1-Y810A + GB2																	#DIV/0!	#DIV/0!	0
GB1-3	GB1-N811A + GB2																	#DIV/0!	#DIV/0!	0
GB1-4	GB1-MYN-AAA + GB2																	#DIV/0!	#DIV/0!	0
GB1-20	GB1-K792A + GB2																	#DIV/0!	#DIV/0!	0
GB2-9	GB1 + GB2-M694A																	#DIV/0!	#DIV/0!	0
GB2-10	GB1 + GB2-Y697A																	#DIV/0!	#DIV/0!	0
GB2-11	GB1 + GB2-N698A																	#DIV/0!	#DIV/0!	0
GB2-12	GB1 + GB2-MYN-AAA																	#DIV/0!	#DIV/0!	0
GB2-22	GB1 + GB2-S695A																	#DIV/0!	#DIV/0!	0
CGP54626 10 μM (with 24h pre-incubation)
																		Mean	SEM	N
Mock	pRK																	#DIV/0!	#DIV/0!	0
WT	GB1 + GB2																	#DIV/0!	#DIV/0!	0
GB1-1	GB1-M807A + GB2																	#DIV/0!	#DIV/0!	0
GB1-2	GB1-Y810A + GB2																	#DIV/0!	#DIV/0!	0
GB1-3	GB1-N811A + GB2																	#DIV/0!	#DIV/0!	0
GB1-4	GB1-MYN-AAA + GB2																	#DIV/0!	#DIV/0!	0
GB1-20	GB1-K792A + GB2																	#DIV/0!	#DIV/0!	0
GB2-9	GB1 + GB2-M694A																	#DIV/0!	#DIV/0!	0
GB2-10	GB1 + GB2-Y697A																	#DIV/0!	#DIV/0!	0
GB2-11	GB1 + GB2-N698A																	#DIV/0!	#DIV/0!	0
GB2-12	GB1 + GB2-MYN-AAA																	#DIV/0!	#DIV/0!	0
GB2-22	GB1 + GB2-S695A																	#DIV/0!	#DIV/0!	0
GS39783 30 μM
			20200527		20200528		20200529		20200604		20200605		20200610					Mean	SEM	N
Mock	pRK		0		0		0		0		0		0					0	0	6
WT	GB1 + GB2		100		100		100		100		100		100					100	0	6
GB1-1	GB1-M807A + GB2								99.3714		56.2987		74.0141					76.5614	12.4991	3
GB1-2	GB1-Y810A + GB2								-10.9894		7.74892		-6.94012					-3.39354	5.69254	3
GB1-3	GB1-N811A + GB2								32.1621		36.0083		32.134					33.4348	1.28679	3
GB1-4	GB1-MYN-AAA + GB2								-12.1087		-2.20382		-0.963487					-5.09199	3.52656	3
GB1-20	GB1-K792A + GB2								92.8615		105.262		149.303					115.809	17.1254	3
GB2-9	GB1 + GB2-M694A		65.9513		119.003		86.9177											90.624	15.4264	3
GB2-10	GB1 + GB2-Y697A		-12.2178		-36.5735		-13.283											-20.6914	7.94696	3
GB2-11	GB1 + GB2-N698A		-3.31338		-16.839		6.13589											-4.67218	6.667	3
GB2-12	GB1 + GB2-MYN-AAA		-5.55295		-44.4336		-13.4284											-21.1383	11.8674	3
GB2-22	GB1 + GB2-S695A		100.069		107.897		131.569											113.178	9.46885	3
CGP7930 30 μM
			20200527		20200528		20200529		20200604		20200605		20200610					Mean	SEM	N
Mock	pRK		0		0		0		0		0		0					0	0	6
WT	GB1 + GB2		100		100		100		100		100		100					100	0	6
GB1-1	GB1-M807A + GB2								104.05		82.6779		88.7826					91.837	6.35593	3
GB1-2	GB1-Y810A + GB2								211.512		153.413		126.23					163.718	25.1522	3
GB1-3	GB1-N811A + GB2								100.327		61.8411		62.2085					74.7922	12.7678	3
GB1-4	GB1-MYN-AAA + GB2								34.1992		98.77		96.1124					76.3605	21.0946	3
GB1-20	GB1-K792A + GB2								35.3489		80.5236		106.986					74.2862	20.9138	3
GB2-9	GB1 + GB2-M694A		4.55024		9.46137		6.0325											6.68137	1.45437	3
GB2-10	GB1 + GB2-Y697A		-3.26554		-5.73359		9.63182											0.2109	4.76404	3
GB2-11	GB1 + GB2-N698A		-2.28343		37.8977		33.8589											23.1577	12.7739	3
GB2-12	GB1 + GB2-MYN-AAA		-10.7358		-35.18		-30.9985											-25.6381	7.54828	3
GB2-22	GB1 + GB2-S695A		83.2432		78.5289		101.694											87.822	7.06817	3
rac-BHFF 30 μM
			20200527		20200528		20200529		20200604		20200605		20200610					Mean	SEM	N
Mock	pRK		0		0		0		0		0		0					0	0	6
WT	GB1 + GB2		100		100		100		100		100		100					100	2.59454e-15	6
GB1-1	GB1-M807A + GB2								115.768		106.763		113.536					112.022	2.70742	3
GB1-2	GB1-Y810A + GB2								38.5334		59.6931		18.4975					38.908	11.8936	3
GB1-3	GB1-N811A + GB2								181.215		165.851		156.844					167.97	7.1149	3
GB1-4	GB1-MYN-AAA + GB2								-26.9142		16.4924		3.3686					-2.35107	12.8526	3
GB1-20	GB1-K792A + GB2								2.12591		50.7128		58.0755					36.9714	17.5519	3
GB2-9	GB1 + GB2-M694A		48.1217		73.3625		79.8923											67.1255	9.68707	3
GB2-10	GB1 + GB2-Y697A		71.4777		67.9286		112.275											83.8937	14.2275	3
GB2-11	GB1 + GB2-N698A		55.885		114.344		133.268											101.166	23.2901	3
GB2-12	GB1 + GB2-MYN-AAA		-10.7427		-6.39963		-25.7336											-14.292	5.85658	3
GB2-22	GB1 + GB2-S695A		108.748		70.4321		106.098											95.0928	12.354	3

[truncated: 8 more sheets: Fig. 4F_%, Fig. 4S1B_%, Fig. 4S2 WT_Raw, Fig. 4S2 WT_%, Fig. 4S2 GB2_Raw, Fig. 4S2 GB2_%, Fig. 4S2 GB1_Raw, Fig. 4S2 GB1_%]
