# Supplementary material for: Allosteric ligands control the activation of a class C GPCR heterodimer by acting at the transmembrane interface
Source: eLife. 2021 Dec 6;10:e70188. doi: 10.7554/eLife.70188 (PMC8700296; doi:10.7554/eLife.70188)
Supplement: Figure 5—source data 1. [file elife-70188-fig5-data1.xlsx]

## Sheet: Fig. 5B
			GABA				rac-BHFF
	Mock		0.148286	0.208038	23		0.399222	0.505326	13
	WT		100	1.09422e-15	23		100	1.60906e-15	13
	M1		85.2134	1.90953	3		89.9552	20.9295	3
	M2		74.4681	9.83503	4		98.4734	8.66747	3
	M3		68.2473	7.71701	4		108.047	7.74046	3
	M4		79.422	7.90849	4		143.624	11.5463	3
	M5		101.404	9.00788	4		149.572	9.88387	3
	M6		47.5633	1.13959	4		37.8471	3.67361	4
	M7		93.4579	5.24007	4		123.636	4.30172	4
	M8		72.6016	3.01411	4		94.5287	15.9685	4
	M9		157.513	13.414	4		216.898	15.1887	3
	M10		144.62	7.75917	4		202.935	14.1971	3
	M11		121.428	7.05925	11		134.413	24.1532	3
	M12		101.037	5.43843	3		83.7005	3.82741	3
	M13		109.929	9.74622	4		157.928	18.4151	3
	M14		110.283	7.45466	14		3.08198	0.969346	5
	M15		122.477	8.04089	13		8.51597	2.33996	4
	M16		105.578	7.68444	4		113.228	14.0137	4

## Sheet: Fig. 5B GABA_Raw
pRK
		20161030	20161111	20161214	20161217	20161220	20161223	20161226	20161229	20170115	20170118	20170416	20170419	20170425	20170428	20170512	20170612	20170624	20170628	20170706	20170709	20170716	20171227	20171229
Concentration (M)	Log M
0.001	-3	1.146	1.111	0.952	0.972	0.969	0.893	0.7525	0.845	1.0635	0.952	0.793	0.828	0.8135	0.907	1.065	0.956	1.6815	1.151	1.2165	1.205	1.114	1.079	1.111
GB1+GB2
		20161030	20161111	20161214	20161217	20161220	20161223	20161226	20161229	20170115	20170118	20170416	20170419	20170425	20170428	20170512	20170612	20170624	20170628	20170706	20170709	20170716	20171227	20171229
Concentration (M)	Log M
Buffer		1.0625	1.066	0.948	0.969	0.971	0.888	0.747	0.736333	0.999	0.938	0.77	1.0695	0.611	0.942	1.004	1.192	1.539	1.301	1.51	1.0715	1.1825	0.983323	1.12046
0.001	-3	9.505	5.792	8.444	8.3055	8.696	3.813	4.603	7.294	14.7925	13.7283	11.8945	15.4023	8.677	9.508	8.1645	14.187	21.301	17.915	22.586	22.178	19.921	18.3574	20.1966
GB1+M1
			20161111	20161214	20161217
Concentration (M)	Log M
0.001	-3		5.262	7.114	7.1755
GB1+M2
						20161220	20161223																20171227	20171229
Concentration (M)	Log M
0.001	-3					4.465	3.4585																15.1912	16.9509
GB1+M3
						20161220	20161223																20171227	20171229
Concentration (M)	Log M
0.001	-3					4.51033	3.24																13.3281	15.5629
GB1+M4
						20161220	20161223																20171227	20171229
Concentration (M)	Log M
0.001	-3					5.33533	3.55867																16.3276	16.6808
GB1+M5
						20161220	20161223																20171227	20171229
Concentration (M)	Log M
0.001	-3					7.18	4.526																18.6014	20.0933
GB1+M6
								20161226	20161229														20171227	20171229
Concentration (M)	Log M
0.001	-3							2.45567	3.97533														9.27113	10.4385
GB1+M7
								20161226	20161229														20171227	20171229
Concentration (M)	Log M
0.001	-3							3.88233	7.70467														16.6458	19.4545
GB1+M8
										20170115	20170118	20170416	20170419
Concentration (M)	Log M
0.001	-3									11.295	9.975	8.0505	12.4873
GB1+M9
						20161220	20161223																20171227	20171229
Concentration (M)	Log M
0.001	-3					10.5577	6.429																27.8956	31.9504
GB1+M10
						20161220	20161223																20171227	20171229
Concentration (M)	Log M
0.001	-3					10.3943	5.46267																27.4859	29.2683
GB1+M11
				20161214	20161217									20170425	20170428	20170512	20170612	20170624	20170628	20170706	20170709	20170716
Concentration (M)	Log M
0.001	-3			9.994	10.3857									10.956	16.2025	10.7923	15.8853	21.5297	18.708	20.261	27.409	21.9475
GB1+M12
		20161030		20161214	20161217
Concentration (M)	Log M
0.001	-3	8.934		8.322	9.14933
GB1+M13
								20161226	20161229	20170115	20170118
Concentration (M)	Log M
0.001	-3							4.693	9.7625	15.8053	12.7557
GB1+M14
		20161030		20161214	20161217					20170115	20170118			20170425	20170428	20170512	20170612	20170624	20170628	20170706	20170709	20170716
Concentration (M)	Log M
0.001	-3	9.489		7.222	7.155					21.2465	17.731			9.849	14.974	11.9077	16.259	19.121	17.511	18.3443	20.6645	18.468
GB1+M15
								20161226	20161229	20170115	20170118			20170425	20170428	20170512	20170612	20170624	20170628	20170706	20170709	20170716
Concentration (M)	Log M
0.001	-3							4.3665	10.164	19.3953	15.6047			12.354	14.908	13.6263	17.679	24.959	15.163	20.014	22.5223	20.555
GB1+M16
								20161226	20161229														20171227	20171229
Concentration (M)	Log M
0.001	-3							4.0785	8.796														18.7223	22.2777

## Sheet: Fig. 5B GABA_%
pRK
		20161030	20161111	20161214	20161217	20161220	20161223	20161226	20161229	20170115	20170118	20170416	20170419	20170425	20170428	20170512	20170612	20170624	20170628	20170706	20170709	20170716	20171227	20171229		Mean	SEM	N
Concentration (M)	Log M
0.001	-3	0.989044	0.952179	0.0533618	0.0408914	-0.02589	0.17094	0.142635	1.65709	0.467612	0.109458	0.206751	-1.68494	2.51054	-0.408592	0.851896	-1.81608	0.721081	-0.902853	-1.39258	0.632507	-0.365558	0.550688	-0.0496031		0.148286	0.208038	23
GB1+GB2
		20161030	20161111	20161214	20161217	20161220	20161223	20161226	20161229	20170115	20170118	20170416	20170419	20170425	20170428	20170512	20170612	20170624	20170628	20170706	20170709	20170716	20171227	20171229		Mean	SEM	N
Concentration (M)	Log M
Buffer		0	0	0	0	0	0	0	0	0	0	0	0	0	0	0	0	0	0	0	0	0	0	0		0	0	23
0.001	-3	100	100	100	100	100	100	100	100	100	100	100	100	100	100	100	100	100	100	100	100	100	100	100		100	1.09422e-15	23
GB1+M1
			20161111	20161214	20161217																					Mean	SEM	N
Concentration (M)	Log M
0.001	-3		88.7854	82.2572	84.5976																					85.2134	1.90953	3
GB1+M2
						20161220	20161223																20171227	20171229		Mean	SEM	N
Concentration (M)	Log M
0.001	-3					45.2298	87.8803																81.7767	82.9858		74.4681	9.83503	4
GB1+M3
						20161220	20161223																20171227	20171229		Mean	SEM	N
Concentration (M)	Log M
0.001	-3					45.8166	80.4103																71.0529	75.7094		68.2473	7.71701	4
GB1+M4
						20161220	20161223																20171227	20171229		Mean	SEM	N
Concentration (M)	Log M
0.001	-3					56.4962	91.3048																88.3172	81.5698		79.422	7.90849	4
GB1+M5
						20161220	20161223																20171227	20171229		Mean	SEM	N
Concentration (M)	Log M
0.001	-3					80.3754	124.376																101.405	99.4587		101.404	9.00788	4
GB1+M6
								20161226	20161229														20171227	20171229		Mean	SEM	N
Concentration (M)	Log M
0.001	-3							44.3119	49.3926														47.7023	48.8465		47.5633	1.13959	4
GB1+M7
								20161226	20161229														20171227	20171229		Mean	SEM	N
Concentration (M)	Log M
0.001	-3							81.3105	106.262														90.1486	96.1102		93.4579	5.24007	4
GB1+M8
										20170115	20170118	20170416	20170419													Mean	SEM	N
Concentration (M)	Log M
0.001	-3									74.6439	70.6549	65.4456	79.6621													72.6016	3.01411	4
GB1+M9
						20161220	20161223																20171227	20171229		Mean	SEM	N
Concentration (M)	Log M
0.001	-3					124.099	189.436																154.9	161.615		157.513	13.414	4
GB1+M10
						20161220	20161223																20171227	20171229		Mean	SEM	N
Concentration (M)	Log M
0.001	-3					121.985	156.399																152.541	147.556		144.62	7.75917	4
GB1+M11
				20161214	20161217									20170425	20170428	20170512	20170612	20170624	20170628	20170706	20170709	20170716				Mean	SEM	N
Concentration (M)	Log M
0.001	-3			120.678	128.354									128.254	178.152	136.699	113.069	101.157	104.773	88.9685	124.784	110.815				121.428	7.05925	11
GB1+M12
		20161030		20161214	20161217																					Mean	SEM	N
Concentration (M)	Log M
0.001	-3	93.2366		98.3725	111.502																					101.037	5.43843	3
GB1+M13
								20161226	20161229	20170115	20170118															Mean	SEM	N
Concentration (M)	Log M
0.001	-3							102.334	137.643	107.343	92.3953															109.929	9.74622	4
GB1+M14
		20161030		20161214	20161217					20170115	20170118			20170425	20170428	20170512	20170612	20170624	20170628	20170706	20170709	20170716				Mean	SEM	N
Concentration (M)	Log M
0.001	-3	99.8105		83.698	84.3181					146.79	131.294			114.53	163.81	152.275	115.945	88.9687	97.5683	79.8744	92.8292	92.2459				110.283	7.45466	14
GB1+M15
								20161226	20161229	20170115	20170118			20170425	20170428	20170512	20170612	20170624	20170628	20170706	20170709	20170716				Mean	SEM	N
Concentration (M)	Log M
0.001	-3							93.8667	143.766	133.37	114.67			145.586	163.04	176.277	126.872	118.51	83.4357	87.7965	101.631	103.383				122.477	8.04089	13
GB1+M16
								20161226	20161229														20171227	20171229		Mean	SEM	N
Concentration (M)	Log M
0.001	-3							86.3978	122.904														102.101	110.91		105.578	7.68444	4

## Sheet: Fig. 5B rac_Raw
pRK
		20161030	20161111	20161214	20161217	20161223	20161226	20161229	20170115	20170118	20170416	20170419	20171227	20171229
Concentration (M)	Log M
3e-05	-4.52288	0.937	1.101	0.893	0.978	0.862	0.823	0.762	0.994	0.975	0.821	0.604667	1.336	1.139
GB1+GB2
		20161030	20161111	20161214	20161217	20161223	20161226	20161229	20170115	20170118	20170416	20170419	20171227	20171229
Concentration (M)	Log M
Buffer		0.9185	1.09	0.901	0.919	0.853	0.806	0.742	1.005	0.915	0.900333	0.847	1.00833	1.10233
3e-05	-4.52288	3.716	2.73	4.201	3.70733	2.41867	2.8325	3.47967	5.531	5.774	4.7975	7.607	9.16619	9.2118
0.0001	-4	5.20133	3.84533	5.619	4.313	2.834	4.162	4.7455	9.345	8.289	8.343	9.94667	13.151	13.4012
GB1+M1
			20161111	20161214	20161217
Concentration (M)	Log M
3e-05	-4.52288		2.57	2.6685	4.434
GB1+M2
						20161223							20171227	20171229
Concentration (M)	Log M
3e-05	-4.52288					2.22267							10.437	8.59232
GB1+M3
						20161223							20171227	20171229
Concentration (M)	Log M
3e-05	-4.52288					2.3245							10.8537	9.97972
GB1+M4
						20161223							20171227	20171229
Concentration (M)	Log M
3e-05	-4.52288					2.834							12.3256	14.5329
GB1+M5
						20161223							20171227	20171229
Concentration (M)	Log M
3e-05	-4.52288					2.99733							12.6493	14.8122
GB1+M6
							20161226	20161229					20171227	20171229
Concentration (M)	Log M
3e-05	-4.52288						1.36567	1.9195					4.05909	4.61887
GB1+M7
							20161226	20161229					20171227	20171229
Concentration (M)	Log M
3e-05	-4.52288						3.1925	4.382					10.3923	11.5466
GB1+M8
									20170115	20170118	20170416	20170419
Concentration (M)	Log M
3e-05	-4.52288								7.171	5.899	3.7325	5.3515
GB1+M9
						20161223							20171227	20171229
Concentration (M)	Log M
3e-05	-4.52288					3.953							17.7933	21.1282
GB1+M10
						20161223							20171227	20171229
Concentration (M)	Log M
3e-05	-4.52288					3.73267							16.8487	19.8114
GB1+M11
			20161111	20161214	20161217
Concentration (M)	Log M
3e-05	-4.52288		4.05533	4.187	4.3445
GB1+M12
		20161030		20161214	20161217
Concentration (M)	Log M
3e-05	-4.52288	3.42		3.42333	3.296
GB1+M13
								20161229	20170115	20170118
Concentration (M)	Log M
3e-05	-4.52288							5.281	9.385	6.8835
GB1+M14
		20161030		20161214	20161217				20170115	20170118
Concentration (M)	Log M
3e-05	-4.52288	0.948333		0.967	0.968				1.199	1.22111
GB1+M15
							20161226	20161229	20170115	20170118
Concentration (M)	Log M
3e-05	-4.52288						0.8675	0.927	1.635	1.418
GB1+M16
							20161226	20161229					20171227	20171229
Concentration (M)	Log M
3e-05	-4.52288						2.3065	4.58967					10.8527	10.6429

## Sheet: Fig. 5B rac_%
pRK
		20161030	20161111	20161214	20161217	20161223	20161226	20161229	20170115	20170118	20170416	20170419	20171227	20171229						Mean	SEM	N
Concentration (M)	Log M
3e-05	-4.52288	0.661305	0.670732	-0.242424	2.11596	0.574835	0.838885	0.730549	-0.24304	1.23482	-2.03567	-3.58481	4.01659	0.452147						0.399222	0.505326	13
GB1+GB2
		20161030	20161111	20161214	20161217	20161223	20161226	20161229	20170115	20170118	20170416	20170419	20171227	20171229						Mean	SEM	N
Concentration (M)	Log M
Buffer		0	0	0	0	0	0	0	0	0	0	0	0	0						0	0	13
3e-05	-4.52288	100	100	100	100	100	100	100	100	100	100	100	100	100						100	1.60906e-15	13
0.0001	-4																			#DIV/0!	#DIV/0!	0
GB1+M1
			20161111	20161214	20161217															Mean	SEM	N
Concentration (M)	Log M
3e-05	-4.52288		90.2439	53.5606	126.061															89.9552	20.9295	3
GB1+M2
						20161223														Mean	SEM	N
Concentration (M)	Log M
3e-05	-4.52288					87.4814														87.4814	#DIV/0!	1
GB1+M3
						20161223														Mean	SEM	N
Concentration (M)	Log M
3e-05	-4.52288					93.9855														93.9855	#DIV/0!	1
GB1+M4
						20161223														Mean	SEM	N
Concentration (M)	Log M
3e-05	-4.52288					126.528														126.528	#DIV/0!	1
GB1+M5
						20161223														Mean	SEM	N
Concentration (M)	Log M
3e-05	-4.52288					136.96														136.96	#DIV/0!	1
GB1+M6
							20161226	20161229												Mean	SEM	N
Concentration (M)	Log M
3e-05	-4.52288						27.6174	43.0111												35.3142	7.69684	2
GB1+M7
							20161226	20161229												Mean	SEM	N
Concentration (M)	Log M
3e-05	-4.52288						117.765	132.96												125.362	7.59766	2
GB1+M8
									20170115	20170118	20170416	20170419								Mean	SEM	N
Concentration (M)	Log M
3e-05	-4.52288								136.235	102.573	72.6725	66.6346								94.5287	15.9685	4
GB1+M9
						20161223														Mean	SEM	N
Concentration (M)	Log M
3e-05	-4.52288					197.999														197.999	#DIV/0!	1
GB1+M10
						20161223														Mean	SEM	N
Concentration (M)	Log M
3e-05	-4.52288					183.926														183.926	#DIV/0!	1
GB1+M11
			20161111	20161214	20161217															Mean	SEM	N
Concentration (M)	Log M
3e-05	-4.52288		180.813	99.5758	122.851															134.413	24.1532	3
GB1+M12
		20161030		20161214	20161217															Mean	SEM	N
Concentration (M)	Log M
3e-05	-4.52288	89.4191		76.4343	85.2481															83.7005	3.82741	3
GB1+M13
								20161229	20170115	20170118										Mean	SEM	N
Concentration (M)	Log M
3e-05	-4.52288							165.798	185.152	122.834										157.928	18.4151	3
GB1+M14
		20161030		20161214	20161217				20170115	20170118										Mean	SEM	N
Concentration (M)	Log M
3e-05	-4.52288	1.06643		2	1.75732				4.28635	6.29979										3.08198	0.969346	5
GB1+M15
							20161226	20161229	20170115	20170118										Mean	SEM	N
Concentration (M)	Log M
3e-05	-4.52288						3.03479	6.75758	13.9196	10.3519										8.51597	2.33996	4
GB1+M16
							20161226	20161229												Mean	SEM	N
Concentration (M)	Log M
3e-05	-4.52288						74.0439	140.545												107.295	33.2508	2

## Sheet: Fig. 5C_Raw
GB1+GB2 (+)
		20180829	20180901	20180903
Concentration (M)	Log M
1e-14	-14	10.9013	3.86874	11.5655
3e-07	-6.52288	12.7697	6.77642	13.2174
1e-06	-6	15.1569	8.03465	14.7929
3e-06	-5.52288	15.4374	8.55638	15.6086
1e-05	-5	24.6958	14.5637	22.8503
3e-05	-4.52288	33.8036	20.6386	29.8087
0.0001	-4	37.8358	21.6031	33.2816
1e-07	-7	13.2972	4.25464	13.6629
GB1+M14 (+)
		20180829	20180901	20180903
Concentration (M)	Log M
1e-14	-14	11.0242	6.11154	18.1707
3e-07	-6.52288	12.8468	10.8059	21.1152
1e-06	-6	13.9379	12.1736	21.7058
3e-06	-5.52288	13.915	14.4819	21.3936
1e-05	-5	21.4415	20.4492	25.4738
3e-05	-4.52288	31.6192	27.795	37.9931
0.0001	-4	35.359	28.6077	46.7781
1e-07	-7	11.1131	10.5559	19.4642
GB1+M15 (+)
		20180829	20180901	20180903
Concentration (M)	Log M
1e-14	-14	7.14195	3.2205	9.5228
3e-07	-6.52288	8.16928	3.70426	11.4323
1e-06	-6	6.88969	4.44472	11.4945
3e-06	-5.52288	8.4198	5.93097	12.2458
1e-05	-5	12.5652	7.2489	13.1098
3e-05	-4.52288	25.0703	15.0223	30.2
0.0001	-4	33.7448	24.2971	43.3846
1e-07	-7	7.61295	3.73474	10.7383

## Sheet: Fig. 5C_%
GB1+GB2 (+)
		20180829	20180901	20180903		Mean	SEM	N
Concentration (M)	Log M
1e-14	-14	28.8122	17.9083	34.7505		27.157	4.93186	3
3e-07	-6.52288	33.7505	31.3678	39.7139		34.9441	2.48213	3
1e-06	-6	40.0598	37.1921	44.4478		40.5666	2.10981	3
3e-06	-5.52288	40.8011	39.6072	46.8986		42.4356	2.25795	3
1e-05	-5	65.271	67.4147	68.6574		67.1144	0.989025	3
3e-05	-4.52288	89.3429	95.5352	89.5653		91.4811	2.02805	3
0.0001	-4	100	100	100		100	5.80156e-15	3
1e-07	-7	35.1444	19.6946	41.0524		31.9638	6.36727	3
GB1+M14 (+)
		20180829	20180901	20180903		Mean	SEM	N
Concentration (M)	Log M
1e-14	-14	29.1371	28.2901	54.5969		37.3413	8.63123	3
3e-07	-6.52288	33.9542	50.0203	63.4441		49.1396	8.52439	3
1e-06	-6	36.8379	56.351	65.2188		52.8026	8.38278	3
3e-06	-5.52288	36.7774	67.0362	64.2808		56.0314	9.65981	3
1e-05	-5	56.6699	94.6584	76.5403		75.9562	10.9702	3
3e-05	-4.52288	83.5695	128.662	114.157		108.796	13.2901	3
0.0001	-4	93.4538	132.424	140.553		122.143	14.5355	3
1e-07	-7	29.3719	48.8631	58.4834		45.5728	8.5633	3
GB1+M15 (+)
		20180829	20180901	20180903		Mean	SEM	N
Concentration (M)	Log M
1e-14	-14	18.8762	14.9076	28.6128		20.7989	4.07149	3
3e-07	-6.52288	21.5914	17.1469	34.3501		24.3628	5.15585	3
1e-06	-6	18.2095	20.5744	34.5371		24.4403	5.09434	3
3e-06	-5.52288	22.2535	27.4543	36.7947		28.8342	4.25399	3
1e-05	-5	33.2099	33.5549	39.3906		35.3851	2.00521	3
3e-05	-4.52288	66.2609	69.5378	90.741		75.5132	7.67242	3
0.0001	-4	89.1875	112.47	130.356		110.671	11.9184	3
1e-07	-7	20.121	17.288	32.265		23.2247	4.59354	3

## Sheet: Fig. 5D_Raw
CA
	20180825	20180827	20180829	20180908	20180910
pRK	126.401	128.074	195.624	146.289	112
GB1+GB2	198.222	200.757	364.686	346.968	252.993
GB1+M11	148.743	146.675	213.713	197.912	133.548
GB1+M12	181.231	173.085	227.866	293.004	182.709
GB1+M13	177.111	169.668	242.348	261.633	148.525
GB1+M14	133.729	132.376	198.56	174.66	112.036
GB1+M15	138.834	139.478	204.402	177.454	118.442

## Sheet: Fig. 5D_%
CA
	20180825	20180827	20180829	20180908	20180910		Mean	SEM	N
pRK	0	0	0	0	0		0	0	5
GB1+GB2	100	100	100	100	100		100	0	5
GB1+M11	31.1085	25.5927	10.6994	25.7245	15.2833		21.6817	3.75537	5
GB1+M12	76.342	61.9276	19.0709	73.1094	50.1509		56.1201	10.343	5
GB1+M13	70.6063	57.2272	27.6372	57.4769	25.9054		47.7706	8.9122	5
GB1+M14	10.2035	5.91947	1.73683	14.1376	0.0254953		6.40457	2.61674	5
GB1+M15	17.3111	15.6901	5.19189	15.5297	4.56893		11.6583	2.78631	5

## Sheet: Fig. 5E&5S4B BRET
Compounds
					Mean	SEM	N
GABA: 100 μM					#DIV/0!	#DIV/0!	0
rac-BHFF: 30 μM					#DIV/0!	#DIV/0!	0
pRK
	20180827	20180914	20180918		Mean	SEM	N
Buffer	1.16598	1.21172	1.15883		1.17884	0.0165656	3
GABA	1.16598	1.21172	1.15883		1.17884	0.0165656	3
Buffer	1.17343	1.20954	1.17153		1.18484	0.012365	3
rac-BHFF	1.17343	1.20954	1.17153		1.18484	0.012365	3
GB1+GB2
	20180827	20180914	20180918		Mean	SEM	N
Buffer	0.978263	1.01991	0.970667		0.989614	0.0153069	3
GABA	0.898243	0.93904	0.903667		0.91365	0.0127912	3
Buffer	0.978908	1.0229	0.963739		0.988516	0.0177408	3
rac-BHFF	0.961951	0.970333	0.930484		0.954256	0.01213	3
GB1+M11
	20180827	20180914	20180918		Mean	SEM	N
Buffer	1.10586	1.16428	1.08089		1.11701	0.0247108	3
GABA	1.01213	1.04282	1		1.01832	0.0127417	3
Buffer	1.10673	1.15969	1.0825		1.11631	0.0227913	3
rac-BHFF	1.10213	1.15233	1.06691		1.10712	0.0247862	3
GB1+M12
	20180827	20180914	20180918		Mean	SEM	N
Buffer	1.03897	1.10562	1.05333		1.06597	0.020251	3
GABA	0.938773	0.980513	0.968333		0.96254	0.0123925	3
Buffer	1.03952	1.09869	1.0537		1.06397	0.0178348	3
rac-BHFF	1.02977	1.04667	1.01705		1.03116	0.00857707	3
GB1+M13
	20180827	20180914	20180918		Mean	SEM	N
Buffer	1.06097	1.10861	1.05567		1.07508	0.0168331	3
GABA	0.958601	0.980641	0.971333		0.970192	0.00638776	3
Buffer	1.06482	1.10776	1.05671		1.07643	0.015839	3
rac-BHFF	1.05887	1.07667	1.03805		1.05786	0.0111594	3
GB1+M14
	20180827	20180914	20180918		Mean	SEM	N
Buffer	1.1183	1.17558	1.09167		1.12851	0.0247551	3
GABA	1.03098	1.05699	1.01433		1.0341	0.0124127	3
Buffer	1.12187	1.17519	1.0918		1.12962	0.0243836	3
rac-BHFF	1.12155	1.169	1.08326		1.1246	0.0247985	3
GB1+M15
	20180827	20180914	20180918		Mean	SEM	N
Buffer	1.10368	1.17261	1.11756		1.13128	0.0210472	3
GABA	0.994835	1.03908	1.025		1.01964	0.0130518	3
Buffer	1.10431	1.17192	1.11936		1.13187	0.0204944	3
rac-BHFF	1.10084	1.17192	1.11463		1.12913	0.021762	3

[truncated: 25 more sheets: Fig. 5E ΔBRET, Fig. 5E ΔBRET_%, Fig. 5E Graph, Fig. 5F_Raw, Fig. 5F_RawA, Fig. 5F_%, Fig. 5H_Raw, Fig. 5H_%, Fig. 5S2_Raw, Fig. 5S2_%, Fig. 5S3A_Raw, Fig. 5S3A_%, Fig. 5S3D_Raw, Fig. 5S3D_%, Fig. 5S3E_Raw, Fig. 5S3E_%, Fig. 5S4A_Raw, Fig. 5S4A_%, Table S2 CGP_Raw, Table S2 CGP_% …]
